# Supplementary material for: Genome-Wide Identification and Evolutionary Analyses of SrfA Operon Genes in Bacillus
Source: MDPI journal article supplement (doi:10.3390/genes14020422), 2023-02-07
Supplement: s1 [file s1]

## Supporting information

**Table S1.** A list of 999 *Bacillus* species genomes used in this study.

**Table S2.** Number of *SrfAA*, *SrfAB* and *SrfAC* genes in 999 *Bacillus* species genomes.

**Table S1** A list of 999 genomes of *Bacillus* species genomes used in this study.

| <b>Accession Number</b> | <b>Species</b>                             |
|-------------------------|--------------------------------------------|
| GCF_004101925           | <i>Bacillus aerophilus</i>                 |
| GCF_009740005           | <i>Bacillus albus</i>                      |
| GCF_000972685           | <i>Bacillus altitudinis</i>                |
| GCF_002443015           | <i>Bacillus altitudinis</i>                |
| GCF_002741745           | <i>Bacillus altitudinis</i>                |
| GCF_007923025           | <i>Bacillus altitudinis</i>                |
| GCF_015160895           | <i>Bacillus altitudinis</i>                |
| GCF_001191605           | <i>Bacillus altitudinis</i>                |
| GCF_001431145           | <i>Bacillus altitudinis</i>                |
| GCF_001431785           | <i>Bacillus altitudinis</i>                |
| GCF_001543165           | <i>Bacillus altitudinis</i>                |
| GCF_016767855           | <i>Bacillus altitudinis</i>                |
| GCF_016807685           | <i>Bacillus altitudinis</i>                |
| GCF_001700735           | <i>Bacillus altitudinis</i>                |
| GCF_000299555           | <i>Bacillus altitudinis</i>                |
| GCF_001908475           | <i>Bacillus altitudinis</i>                |
| GCF_011067205           | <i>Bacillus altitudinis</i>                |
| GCF_013283915           | <i>Bacillus altitudinis</i>                |
| GCF_013307105           | <i>Bacillus altitudinis</i>                |
| GCF_004563755           | <i>Bacillus altitudinis</i>                |
| GCF_005849435           | <i>Bacillus altitudinis</i>                |
| GCF_006007905           | <i>Bacillus altitudinis</i>                |
| GCF_017948365           | <i>Bacillus altitudinis</i> Strain: 6ww6   |
| GCF_015689015           | <i>Bacillus altitudinis</i> Strain: Ba1449 |
| GCF_017161205           | <i>Bacillus altitudinis</i> Strain: 1817   |
| GCF_019164215           | <i>Bacillus altitudinis</i> Strain: LZP 02 |
| GCF_019355135           | <i>Bacillus altitudinis</i> Strain: SCU11  |
| GCF_014622745           | <i>Bacillus amyloliquefaciens</i>          |
| GCF_014791945           | <i>Bacillus amyloliquefaciens</i>          |
| GCF_014792065           | <i>Bacillus amyloliquefaciens</i>          |
| GCF_014854735           | <i>Bacillus amyloliquefaciens</i>          |
| GCF_007362635           | <i>Bacillus amyloliquefaciens</i>          |
| GCF_014930895           | <i>Bacillus amyloliquefaciens</i>          |
| GCF_007827165           | <i>Bacillus amyloliquefaciens</i>          |
| GCF_007923205           | <i>Bacillus amyloliquefaciens</i>          |
| GCF_008534375           | <i>Bacillus amyloliquefaciens</i>          |
| GCF_015999565           | <i>Bacillus amyloliquefaciens</i>          |
| GCF_001483885           | <i>Bacillus amyloliquefaciens</i>          |
| GCF_008808015           | <i>Bacillus amyloliquefaciens</i>          |
| GCF_008824205           | <i>Bacillus amyloliquefaciens</i>          |
| GCF_001586105           | <i>Bacillus amyloliquefaciens</i>          |

---

|               |                                                      |
|---------------|------------------------------------------------------|
| GCF_001596755 | <i>Bacillus amyloliquefaciens</i>                    |
| GCF_003149695 | <i>Bacillus amyloliquefaciens</i>                    |
| GCF_003149715 | <i>Bacillus amyloliquefaciens</i>                    |
| GCF_003149795 | <i>Bacillus amyloliquefaciens</i>                    |
| GCF_003312895 | <i>Bacillus amyloliquefaciens</i>                    |
| GCF_001705195 | <i>Bacillus amyloliquefaciens</i>                    |
| GCF_001874385 | <i>Bacillus amyloliquefaciens</i>                    |
| GCF_001889285 | <i>Bacillus amyloliquefaciens</i>                    |
| GCF_001922005 | <i>Bacillus amyloliquefaciens</i>                    |
| GCF_003868675 | <i>Bacillus amyloliquefaciens</i>                    |
| GCF_004006115 | <i>Bacillus amyloliquefaciens</i>                    |
| GCF_013122255 | <i>Bacillus amyloliquefaciens</i>                    |
| GCF_002173635 | <i>Bacillus amyloliquefaciens</i>                    |
| GCF_013328835 | <i>Bacillus amyloliquefaciens</i>                    |
| GCF_013341255 | <i>Bacillus amyloliquefaciens</i>                    |
| GCF_002209305 | <i>Bacillus amyloliquefaciens</i>                    |
| GCF_004421045 | <i>Bacillus amyloliquefaciens</i>                    |
| GCF_019396925 | <i>Bacillus amyloliquefaciens</i> Strain: GKT04      |
| GCF_018223605 | <i>Bacillus amyloliquefaciens</i> Strain: Ba13       |
| GCF_017357905 | <i>Bacillus amyloliquefaciens</i> Strain: GXU-1      |
| GCF_018363035 | <i>Bacillus amyloliquefaciens</i> Strain: L-17       |
| GCF_018502525 | <i>Bacillus amyloliquefaciens</i> Strain: SN16-1     |
| GCF_000494835 | <i>Bacillus amyloliquefaciens</i> CC178              |
| GCF_000196735 | <i>Bacillus amyloliquefaciens</i> DSM 7 = ATCC 23350 |
| GCF_000242855 | <i>Bacillus amyloliquefaciens</i> IT-45              |
| GCF_000835145 | <i>Bacillus amyloliquefaciens</i> KHG19              |
| GCF_000508265 | <i>Bacillus amyloliquefaciens</i> LFB112             |
| GCF_000204275 | <i>Bacillus amyloliquefaciens</i> LL3                |
| GCF_017815555 | <i>Bacillus amyloliquefaciens</i> Strain: G10        |
| GCF_017603845 | <i>Bacillus amyloliquefaciens</i> Strain: XJ5        |
| GCF_000195515 | <i>Bacillus amyloliquefaciens</i> TA208              |
| GCF_001593785 | <i>Bacillus amyloliquefaciens</i> UMAF6614           |
| GCF_001593765 | <i>Bacillus amyloliquefaciens</i> UMAF6639           |
| GCF_000221645 | <i>Bacillus amyloliquefaciens</i> XH7                |
| GCF_000262385 | <i>Bacillus amyloliquefaciens</i> Y2                 |
| GCF_006088855 | <i>Bacillus anthracis</i>                            |
| GCF_014249775 | <i>Bacillus anthracis</i>                            |
| GCF_000875715 | <i>Bacillus anthracis</i>                            |
| GCF_002277915 | <i>Bacillus anthracis</i>                            |
| GCF_002356575 | <i>Bacillus anthracis</i>                            |
| GCF_006742565 | <i>Bacillus anthracis</i>                            |
| GCF_001277955 | <i>Bacillus anthracis</i>                            |
| GCF_001543225 | <i>Bacillus anthracis</i>                            |
| GCF_002980615 | <i>Bacillus anthracis</i>                            |

---

---

|               |                           |
|---------------|---------------------------|
| GCF_001654475 | <i>Bacillus anthracis</i> |
| GCF_001683065 | <i>Bacillus anthracis</i> |
| GCF_001683095 | <i>Bacillus anthracis</i> |
| GCF_001683135 | <i>Bacillus anthracis</i> |
| GCF_003227955 | <i>Bacillus anthracis</i> |
| GCF_001683155 | <i>Bacillus anthracis</i> |
| GCF_001683175 | <i>Bacillus anthracis</i> |
| GCF_001683195 | <i>Bacillus anthracis</i> |
| GCF_001683215 | <i>Bacillus anthracis</i> |
| GCF_001683235 | <i>Bacillus anthracis</i> |
| GCF_001683255 | <i>Bacillus anthracis</i> |
| GCF_001683275 | <i>Bacillus anthracis</i> |
| GCF_001683295 | <i>Bacillus anthracis</i> |
| GCF_003410255 | <i>Bacillus anthracis</i> |
| GCF_003410355 | <i>Bacillus anthracis</i> |
| GCF_009806595 | <i>Bacillus anthracis</i> |
| GCF_009806615 | <i>Bacillus anthracis</i> |
| GCF_009806635 | <i>Bacillus anthracis</i> |
| GCF_009806655 | <i>Bacillus anthracis</i> |
| GCF_009806675 | <i>Bacillus anthracis</i> |
| GCF_009806695 | <i>Bacillus anthracis</i> |
| GCF_001936375 | <i>Bacillus anthracis</i> |
| GCF_000534935 | <i>Bacillus anthracis</i> |
| GCF_001990245 | <i>Bacillus anthracis</i> |
| GCF_012273315 | <i>Bacillus anthracis</i> |
| GCF_000725325 | <i>Bacillus anthracis</i> |
| GCF_012273335 | <i>Bacillus anthracis</i> |
| GCF_012273355 | <i>Bacillus anthracis</i> |
| GCF_000742315 | <i>Bacillus anthracis</i> |
| GCF_012273375 | <i>Bacillus anthracis</i> |
| GCF_000742655 | <i>Bacillus anthracis</i> |
| GCF_000742695 | <i>Bacillus anthracis</i> |
| GCF_000742875 | <i>Bacillus anthracis</i> |
| GCF_000831505 | <i>Bacillus anthracis</i> |
| GCF_000832425 | <i>Bacillus anthracis</i> |
| GCF_000832445 | <i>Bacillus anthracis</i> |
| GCF_000832465 | <i>Bacillus anthracis</i> |
| GCF_004328845 | <i>Bacillus anthracis</i> |
| GCF_000832505 | <i>Bacillus anthracis</i> |
| GCF_002208785 | <i>Bacillus anthracis</i> |
| GCF_000832565 | <i>Bacillus anthracis</i> |
| GCF_000832585 | <i>Bacillus anthracis</i> |
| GCF_013349165 | <i>Bacillus anthracis</i> |
| GCF_000832665 | <i>Bacillus anthracis</i> |

---

---

|               |                                                |
|---------------|------------------------------------------------|
| GCF_013349185 | <i>Bacillus anthracis</i>                      |
| GCF_000832725 | <i>Bacillus anthracis</i>                      |
| GCF_013349245 | <i>Bacillus anthracis</i>                      |
| GCF_000832745 | <i>Bacillus anthracis</i>                      |
| GCF_000832965 | <i>Bacillus anthracis</i>                      |
| GCF_000833065 | <i>Bacillus anthracis</i>                      |
| GCF_000833125 | <i>Bacillus anthracis</i>                      |
| GCF_000559005 | <i>Bacillus anthracis</i> 52-G                 |
| GCF_000558965 | <i>Bacillus anthracis</i> 8903-G               |
| GCF_000558985 | <i>Bacillus anthracis</i> 9080-G               |
| GCF_000022865 | <i>Bacillus anthracis</i> str. A0248           |
| GCF_000512835 | <i>Bacillus anthracis</i> str. A16             |
| GCF_000512775 | <i>Bacillus anthracis</i> str. A16R            |
| GCF_000007845 | <i>Bacillus anthracis</i> str. Ames            |
| GCF_000008445 | <i>Bacillus anthracis</i> str. 'Ames Ancestor' |
| GCF_000295695 | <i>Bacillus anthracis</i> str. BF1             |
| GCF_000021445 | <i>Bacillus anthracis</i> str. CDC 684         |
| GCF_000258885 | <i>Bacillus anthracis</i> str. H9401           |
| GCF_000008165 | <i>Bacillus anthracis</i> str. Sterne          |
| GCF_000832635 | <i>Bacillus anthracis</i> str. Sterne          |
| GCF_000583105 | <i>Bacillus anthracis</i> str. SVA11           |
| GCF_000833275 | <i>Bacillus anthracis</i> str. Turkey32        |
| GCF_000832785 | <i>Bacillus anthracis</i> str. V770-NP-1R      |
| GCF_000742895 | <i>Bacillus anthracis</i> str. Vollum          |
| GCF_019693235 | <i>Bacillus anthracis</i> Strain: P04210076    |
| GCF_002688645 | <i>Bacillus atrophaeus</i>                     |
| GCF_002173495 | <i>Bacillus atrophaeus</i>                     |
| GCF_002243495 | <i>Bacillus atrophaeus</i>                     |
| GCF_018140555 | <i>Bacillus atrophaeus</i> Strain: CNY01       |
| GCF_019443725 | <i>Bacillus atrophaeus</i> Strain: PENSV20     |
| GCF_000165925 | <i>Bacillus atrophaeus</i> 1942                |
| GCF_000742675 | <i>Bacillus atrophaeus</i> subsp. globigii     |
| GCF_000385965 | <i>Bacillus atrophaeus</i> UCMB-5137           |
| GCF_001721685 | <i>Bacillus beveridgei</i>                     |
| GCF_000831065 | <i>Bacillus bombysepticus</i> str. Wang        |
| GCF_000835185 | <i>Bacillus cereus</i>                         |
| GCF_006384875 | <i>Bacillus cereus</i>                         |
| GCF_002290105 | <i>Bacillus cereus</i>                         |
| GCF_000978375 | <i>Bacillus cereus</i>                         |
| GCF_008041975 | <i>Bacillus cereus</i>                         |
| GCF_001277915 | <i>Bacillus cereus</i>                         |
| GCF_002813875 | <i>Bacillus cereus</i>                         |
| GCF_001518875 | <i>Bacillus cereus</i>                         |
| GCF_016027015 | <i>Bacillus cereus</i>                         |

---

---

|               |                        |
|---------------|------------------------|
| GCF_003013315 | <i>Bacillus cereus</i> |
| GCF_003020845 | <i>Bacillus cereus</i> |
| GCF_009497015 | <i>Bacillus cereus</i> |
| GCF_016727405 | <i>Bacillus cereus</i> |
| GCF_016774535 | <i>Bacillus cereus</i> |
| GCF_016774555 | <i>Bacillus cereus</i> |
| GCF_016774575 | <i>Bacillus cereus</i> |
| GCF_001635915 | <i>Bacillus cereus</i> |
| GCF_001635955 | <i>Bacillus cereus</i> |
| GCF_001635995 | <i>Bacillus cereus</i> |
| GCF_016917795 | <i>Bacillus cereus</i> |
| GCF_009739925 | <i>Bacillus cereus</i> |
| GCF_009739965 | <i>Bacillus cereus</i> |
| GCF_009739985 | <i>Bacillus cereus</i> |
| GCF_001721145 | <i>Bacillus cereus</i> |
| GCF_003568565 | <i>Bacillus cereus</i> |
| GCF_001880305 | <i>Bacillus cereus</i> |
| GCF_010223795 | <i>Bacillus cereus</i> |
| GCF_010232525 | <i>Bacillus cereus</i> |
| GCF_001941885 | <i>Bacillus cereus</i> |
| GCF_001941905 | <i>Bacillus cereus</i> |
| GCF_001941925 | <i>Bacillus cereus</i> |
| GCF_000635895 | <i>Bacillus cereus</i> |
| GCF_004006495 | <i>Bacillus cereus</i> |
| GCF_002000005 | <i>Bacillus cereus</i> |
| GCF_013112375 | <i>Bacillus cereus</i> |
| GCF_002117465 | <i>Bacillus cereus</i> |
| GCF_013177495 | <i>Bacillus cereus</i> |
| GCF_000789315 | <i>Bacillus cereus</i> |
| GCF_013267235 | <i>Bacillus cereus</i> |
| GCF_013267255 | <i>Bacillus cereus</i> |
| GCF_013267275 | <i>Bacillus cereus</i> |
| GCF_013267455 | <i>Bacillus cereus</i> |
| GCF_013267475 | <i>Bacillus cereus</i> |
| GCF_013267775 | <i>Bacillus cereus</i> |
| GCF_000832525 | <i>Bacillus cereus</i> |
| GCF_002214705 | <i>Bacillus cereus</i> |
| GCF_002214725 | <i>Bacillus cereus</i> |
| GCF_002214765 | <i>Bacillus cereus</i> |
| GCF_002215175 | <i>Bacillus cereus</i> |
| GCF_002216125 | <i>Bacillus cereus</i> |
| GCF_004771155 | <i>Bacillus cereus</i> |
| GCF_000832765 | <i>Bacillus cereus</i> |
| GCF_002220285 | <i>Bacillus cereus</i> |

---

---

|               |                                                 |
|---------------|-------------------------------------------------|
| GCF_004801195 | <i>Bacillus cereus</i>                          |
| GCF_013394245 | <i>Bacillus cereus</i>                          |
| GCF_005707595 | <i>Bacillus cereus</i>                          |
| GCF_018309125 | <i>Bacillus cereus</i> Strain: BC06             |
| GCF_018309165 | <i>Bacillus cereus</i> Strain: BC33             |
| GCF_018884185 | <i>Bacillus cereus</i> Strain: CF4-51           |
| GCF_018309145 | <i>Bacillus cereus</i> Strain: BC07             |
| GCF_016117775 | <i>Bacillus cereus</i> Strain: FDAARGOS_919     |
| GCF_002952815 | <i>Bacillus cereus</i> Strain: G9241            |
| GCF_000022505 | <i>Bacillus cereus</i> 03BB102                  |
| GCF_000832405 | <i>Bacillus cereus</i> 03BB102                  |
| GCF_000832865 | <i>Bacillus cereus</i> 03BB108                  |
| GCF_000160935 | <i>Bacillus cereus</i> 172560W                  |
| GCF_000161135 | <i>Bacillus cereus</i> 95/8201                  |
| GCF_000161375 | <i>Bacillus cereus</i> AH1271                   |
| GCF_000161395 | <i>Bacillus cereus</i> AH1272                   |
| GCF_000003955 | <i>Bacillus cereus</i> AH1273                   |
| GCF_000021225 | <i>Bacillus cereus</i> AH187                    |
| GCF_000161355 | <i>Bacillus cereus</i> AH676                    |
| GCF_000021785 | <i>Bacillus cereus</i> AH820                    |
| GCF_000160895 | <i>Bacillus cereus</i> ATCC 10876               |
| GCF_000008005 | <i>Bacillus cereus</i> ATCC 10987               |
| GCF_006094295 | <i>Bacillus cereus</i> ATCC 14579               |
| GCF_000007825 | <i>Bacillus cereus</i> ATCC 14579               |
| GCF_002504205 | <i>Bacillus cereus</i> ATCC 14579               |
| GCF_000161015 | <i>Bacillus cereus</i> ATCC 4342                |
| GCF_000832845 | <i>Bacillus cereus</i> ATCC 4342                |
| GCF_000021205 | <i>Bacillus cereus</i> B4264                    |
| GCF_000161115 | <i>Bacillus cereus</i> BDRD-Cer4                |
| GCF_000161095 | <i>Bacillus cereus</i> BDRD-ST196               |
| GCF_000161055 | <i>Bacillus cereus</i> BDRD-ST24                |
| GCF_000160915 | <i>Bacillus cereus</i> BGSC 6E1                 |
| GCF_000143605 | <i>Bacillus cereus</i> biovar anthracis str. CI |
| GCF_002224345 | <i>Bacillus cereus</i> C1L                      |
| GCF_000832385 | <i>Bacillus cereus</i> D17                      |
| GCF_000011625 | <i>Bacillus cereus</i> E33L                     |
| GCF_000833045 | <i>Bacillus cereus</i> E33L                     |
| GCF_000338315 | <i>Bacillus cereus</i> F                        |
| GCF_000161315 | <i>Bacillus cereus</i> F65185                   |
| GCF_000239195 | <i>Bacillus cereus</i> F837/76                  |
| GCF_000292415 | <i>Bacillus cereus</i> FRI-35                   |
| GCF_000832805 | <i>Bacillus cereus</i> G9241                    |
| GCF_000021305 | <i>Bacillus cereus</i> G9842                    |
| GCF_000003645 | <i>Bacillus cereus</i> m1293                    |

---



---

|               |                                             |
|---------------|---------------------------------------------|
| GCF_000161035 | <i>Bacillus cereus</i> m1550                |
| GCF_000283675 | <i>Bacillus cereus</i> NC7401               |
| GCF_000013065 | <i>Bacillus cereus</i> Q1                   |
| GCF_000161175 | <i>Bacillus cereus</i> Rock1-15             |
| GCF_000161155 | <i>Bacillus cereus</i> Rock1-3              |
| GCF_000161195 | <i>Bacillus cereus</i> Rock3-28             |
| GCF_000161215 | <i>Bacillus cereus</i> Rock3-29             |
| GCF_000161235 | <i>Bacillus cereus</i> Rock3-42             |
| GCF_000161255 | <i>Bacillus cereus</i> Rock3-44             |
| GCF_000161295 | <i>Bacillus cereus</i> Rock4-18             |
| GCF_000161275 | <i>Bacillus cereus</i> Rock4-2              |
| GCF_007923085 | <i>Bacillus cereus</i> Strain: Co1-1        |
| GCF_002251005 | <i>Bacillus cytotoxicus</i>                 |
| GCF_002251025 | <i>Bacillus cytotoxicus</i>                 |
| GCF_002251045 | <i>Bacillus cytotoxicus</i>                 |
| GCF_002251055 | <i>Bacillus cytotoxicus</i>                 |
| GCF_002251115 | <i>Bacillus cytotoxicus</i>                 |
| GCF_002250885 | <i>Bacillus cytotoxicus</i>                 |
| GCF_002250905 | <i>Bacillus cytotoxicus</i>                 |
| GCF_002250925 | <i>Bacillus cytotoxicus</i>                 |
| GCF_002250945 | <i>Bacillus cytotoxicus</i>                 |
| GCF_002250965 | <i>Bacillus cytotoxicus</i>                 |
| GCF_017909295 | <i>Bacillus cytotoxicus</i> Strain: E28.3   |
| GCF_017909135 | <i>Bacillus cytotoxicus</i> Strain: SM1.1   |
| GCF_017909395 | <i>Bacillus cytotoxicus</i> Strain: E17.4   |
| GCF_017909435 | <i>Bacillus cytotoxicus</i> Strain: E8.1    |
| GCF_017909235 | <i>Bacillus cytotoxicus</i> Strain: PDT2.12 |
| GCF_017909015 | <i>Bacillus cytotoxicus</i> Strain: SM2.8   |
| GCF_000017425 | <i>Bacillus cytotoxicus</i> NVH 391-98      |
| GCF_007995155 | <i>Bacillus dafuensis</i>                   |
| GCF_900636945 | <i>Bacillus freudenreichii</i>              |
| GCF_002443095 | <i>Bacillus glycinifermentans</i>           |
| GCF_004103615 | <i>Bacillus glycinifermentans</i>           |
| GCF_900093775 | <i>Bacillus glycinifermentans</i>           |
| GCF_001278705 | <i>Bacillus gobiensis</i>                   |
| GCF_018623075 | <i>Bacillus haikouensis</i> Strain: MNJ12   |
| GCF_014621755 | <i>Bacillus halotolerans</i>                |
| GCF_006965425 | <i>Bacillus halotolerans</i>                |
| GCF_016093395 | <i>Bacillus halotolerans</i>                |
| GCF_004006435 | <i>Bacillus halotolerans</i>                |
| GCF_018417515 | <i>Bacillus halotolerans</i> Strain: MBH1   |
| GCF_014042035 | <i>Bacillus haynesii</i>                    |
| GCF_001534785 | <i>Bacillus inaquosorum</i>                 |
| GCF_003148415 | <i>Bacillus inaquosorum</i>                 |

---



---

|               |                                                   |
|---------------|---------------------------------------------------|
| GCF_019598985 | <i>Bacillus inaquosorum</i> Strain: CCSR02        |
| GCF_000473245 | <i>Bacillus infantis</i> NRRL B-14911             |
| GCF_000959025 | <i>Bacillus intestinalis</i>                      |
| GCF_006094335 | <i>Bacillus licheniformis</i>                     |
| GCF_006494795 | <i>Bacillus licheniformis</i>                     |
| GCF_014673515 | <i>Bacillus licheniformis</i>                     |
| GCF_006974025 | <i>Bacillus licheniformis</i>                     |
| GCF_002504325 | <i>Bacillus licheniformis</i>                     |
| GCF_007855455 | <i>Bacillus licheniformis</i>                     |
| GCF_016026835 | <i>Bacillus licheniformis</i>                     |
| GCF_002966955 | <i>Bacillus licheniformis</i>                     |
| GCF_016126875 | <i>Bacillus licheniformis</i>                     |
| GCF_001596055 | <i>Bacillus licheniformis</i>                     |
| GCF_009662395 | <i>Bacillus licheniformis</i>                     |
| GCF_003253815 | <i>Bacillus licheniformis</i>                     |
| GCF_003339545 | <i>Bacillus licheniformis</i>                     |
| GCF_001726125 | <i>Bacillus licheniformis</i>                     |
| GCF_003595625 | <i>Bacillus licheniformis</i>                     |
| GCF_003606405 | <i>Bacillus licheniformis</i>                     |
| GCF_001914255 | <i>Bacillus licheniformis</i>                     |
| GCF_003952865 | <i>Bacillus licheniformis</i>                     |
| GCF_004101525 | <i>Bacillus licheniformis</i>                     |
| GCF_002074075 | <i>Bacillus licheniformis</i>                     |
| GCF_002074095 | <i>Bacillus licheniformis</i>                     |
| GCF_002074115 | <i>Bacillus licheniformis</i>                     |
| GCF_002074135 | <i>Bacillus licheniformis</i>                     |
| GCF_004103575 | <i>Bacillus licheniformis</i>                     |
| GCF_002173675 | <i>Bacillus licheniformis</i>                     |
| GCF_004119755 | <i>Bacillus licheniformis</i>                     |
| GCF_002174255 | <i>Bacillus licheniformis</i>                     |
| GCF_004119795 | <i>Bacillus licheniformis</i>                     |
| GCF_004526275 | <i>Bacillus licheniformis</i>                     |
| GCF_002236895 | <i>Bacillus licheniformis</i>                     |
| GCF_902386215 | <i>Bacillus licheniformis</i>                     |
| GCF_017338795 | <i>Bacillus licheniformis</i> Strain: CP6         |
| GCF_015689075 | <i>Bacillus licheniformis</i> Strain: LCDD6       |
| GCF_002953475 | <i>Bacillus licheniformis</i> Strain: MBGJa67     |
| GCF_000008425 | <i>Bacillus licheniformis</i> DSM 13 = ATCC 14580 |
| GCF_000011645 | <i>Bacillus licheniformis</i> DSM 13 = ATCC 14580 |
| GCF_000258125 | <i>Bacillus licheniformis</i> WX-02               |
| GCF_009739945 | <i>Bacillus luti</i>                              |
| GCF_000724485 | <i>Bacillus methanolicus</i> MGA3                 |
| GCF_003612955 | <i>Bacillus mobilis</i>                           |
| GCF_015074845 | <i>Bacillus mojavensis</i>                        |

---

---

|               |                                          |
|---------------|------------------------------------------|
| GCF_012648005 | <i>Bacillus mojavenensis</i>             |
| GCF_008274925 | <i>Bacillus mycoides</i>                 |
| GCF_000160975 | <i>Bacillus mycoides</i>                 |
| GCF_000161335 | <i>Bacillus mycoides</i>                 |
| GCF_002104575 | <i>Bacillus mycoides</i>                 |
| GCF_000775975 | <i>Bacillus mycoides</i>                 |
| GCF_000832605 | <i>Bacillus mycoides</i>                 |
| GCF_018736725 | <i>Bacillus mycoides</i> Strain: BPN07/3 |
| GCF_018736765 | <i>Bacillus mycoides</i> Strain: BPN102  |
| GCF_018739385 | <i>Bacillus mycoides</i> Strain: BPN29/1 |
| GCF_018742205 | <i>Bacillus mycoides</i> Strain: BPN29/1 |
| GCF_018739485 | <i>Bacillus mycoides</i> Strain: BPN36/3 |
| GCF_018739525 | <i>Bacillus mycoides</i> Strain: BPN37/2 |
| GCF_018739625 | <i>Bacillus mycoides</i> Strain: BPN51/1 |
| GCF_018739645 | <i>Bacillus mycoides</i> Strain: BPN52/2 |
| GCF_018741085 | <i>Bacillus mycoides</i> Strain: BPN601  |
| GCF_018741145 | <i>Bacillus mycoides</i> Strain: JAS06/1 |
| GCF_018741165 | <i>Bacillus mycoides</i> Strain: JAS06/3 |
| GCF_018742045 | <i>Bacillus mycoides</i> Strain: JAS12/5 |
| GCF_018741565 | <i>Bacillus mycoides</i> Strain: JAS23/1 |
| GCF_018741605 | <i>Bacillus mycoides</i> Strain: JAS391  |
| GCF_018741645 | <i>Bacillus mycoides</i> Strain: JAS481  |
| GCF_018736705 | <i>Bacillus mycoides</i> Strain: BPN03/1 |
| GCF_018736745 | <i>Bacillus mycoides</i> Strain: BPN09/1 |
| GCF_018739305 | <i>Bacillus mycoides</i> Strain: BPN121  |
| GCF_018739505 | <i>Bacillus mycoides</i> Strain: BPN37/1 |
| GCF_018739545 | <i>Bacillus mycoides</i> Strain: BPN43/2 |
| GCF_018739665 | <i>Bacillus mycoides</i> Strain: BPN54/2 |
| GCF_018740945 | <i>Bacillus mycoides</i> Strain: BPN573  |
| GCF_018741005 | <i>Bacillus mycoides</i> Strain: BPN58/4 |
| GCF_018739705 | <i>Bacillus mycoides</i> Strain: JAS014  |
| GCF_018742185 | <i>Bacillus mycoides</i> Strain: JAS06/1 |
| GCF_018741465 | <i>Bacillus mycoides</i> Strain: JAS1004 |
| GCF_018741505 | <i>Bacillus mycoides</i> Strain: JAS12/5 |
| GCF_018751995 | <i>Bacillus mycoides</i> Strain: JAS15/1 |
| GCF_018742225 | <i>Bacillus mycoides</i> Strain: JAS635  |
| GCF_018742105 | <i>Bacillus mycoides</i> Strain: JAS85/1 |
| GCF_018742265 | <i>Bacillus mycoides</i> Strain: JAS85/1 |
| GCF_018742285 | <i>Bacillus mycoides</i> Strain: JAS94/5 |
| GCF_000003925 | <i>Bacillus mycoides</i> DSM 2048        |
| GCF_000018825 | <i>Bacillus mycoides</i> KBAB4           |
| GCF_018739365 | <i>Bacillus mycoides</i> Strain: BPN211  |
| GCF_018739445 | <i>Bacillus mycoides</i> Strain: BPN36/2 |
| GCF_018739685 | <i>Bacillus mycoides</i> Strain: BPN57/2 |

---

---

|               |                                                 |
|---------------|-------------------------------------------------|
| GCF_016117755 | <i>Bacillus mycoides</i> Strain: FDAARGOS_924   |
| GCF_018742245 | <i>Bacillus mycoides</i> Strain: JAS823         |
| GCF_018141025 | <i>Bacillus nitratreducens</i> Strain: BM02     |
| GCF_016925055 | <i>Bacillus pacificus</i> Strain: Colony7       |
| GCF_016925035 | <i>Bacillus pacificus</i> Strain: Colony 6      |
| GCF_016925015 | <i>Bacillus pacificus</i> Strain: Colony501     |
| GCF_000876525 | <i>Bacillus paralicheniformis</i>               |
| GCF_002393225 | <i>Bacillus paralicheniformis</i>               |
| GCF_008365255 | <i>Bacillus paralicheniformis</i>               |
| GCF_002993925 | <i>Bacillus paralicheniformis</i>               |
| GCF_002993945 | <i>Bacillus paralicheniformis</i>               |
| GCF_009497935 | <i>Bacillus paralicheniformis</i>               |
| GCF_003711025 | <i>Bacillus paralicheniformis</i>               |
| GCF_011068305 | <i>Bacillus paralicheniformis</i>               |
| GCF_002068155 | <i>Bacillus paralicheniformis</i>               |
| GCF_900635765 | <i>Bacillus paralicheniformis</i>               |
| GCF_018324565 | <i>Bacillus paralicheniformis</i> Strain: RSC-2 |
| GCF_000408885 | <i>Bacillus paralicheniformis</i> ATCC 9945a    |
| GCF_018324505 | <i>Bacillus paralicheniformis</i> Strain: RSC-1 |
| GCF_015334865 | <i>Bacillus paranthracis</i>                    |
| GCF_015693885 | <i>Bacillus paranthracis</i>                    |
| GCF_009648955 | <i>Bacillus paranthracis</i>                    |
| GCF_016834515 | <i>Bacillus paranthracis</i>                    |
| GCF_009799965 | <i>Bacillus paranthracis</i>                    |
| GCF_010669045 | <i>Bacillus paranthracis</i>                    |
| GCF_005848985 | <i>Bacillus paranthracis</i>                    |
| GCF_018513785 | <i>Bacillus paranthracis</i> Strain: Colony502  |
| GCF_000161415 | <i>Bacillus pseudomycoides</i>                  |
| GCF_000161435 | <i>Bacillus pseudomycoides</i>                  |
| GCF_000742855 | <i>Bacillus pseudomycoides</i>                  |
| GCF_000832885 | <i>Bacillus pseudomycoides</i>                  |
| GCF_000161455 | <i>Bacillus pseudomycoides</i> DSM 12442        |
| GCF_014489355 | <i>Bacillus pumilus</i>                         |
| GCF_001548215 | <i>Bacillus pumilus</i>                         |
| GCF_001578165 | <i>Bacillus pumilus</i>                         |
| GCF_001578205 | <i>Bacillus pumilus</i>                         |
| GCF_001687085 | <i>Bacillus pumilus</i>                         |
| GCF_003431975 | <i>Bacillus pumilus</i>                         |
| GCF_001704975 | <i>Bacillus pumilus</i>                         |
| GCF_003571425 | <i>Bacillus pumilus</i>                         |
| GCF_009937765 | <i>Bacillus pumilus</i>                         |
| GCF_000590455 | <i>Bacillus pumilus</i>                         |
| GCF_004006455 | <i>Bacillus pumilus</i>                         |
| GCF_013423765 | <i>Bacillus pumilus</i>                         |

---

---

|               |                                       |
|---------------|---------------------------------------|
| GCF_900186955 | <i>Bacillus pumilus</i>               |
| GCF_000017885 | <i>Bacillus pumilus</i> SAFR-032      |
| GCF_008244765 | <i>Bacillus safensis</i>              |
| GCF_016803835 | <i>Bacillus safensis</i>              |
| GCF_001895885 | <i>Bacillus safensis</i>              |
| GCF_001938665 | <i>Bacillus safensis</i>              |
| GCF_001938685 | <i>Bacillus safensis</i>              |
| GCF_001938705 | <i>Bacillus safensis</i>              |
| GCF_002077215 | <i>Bacillus safensis</i>              |
| GCF_003660145 | <i>Bacillus safensis</i> Strain: sami |
| GCF_003097715 | <i>Bacillus safensis</i> FO-36b       |
| GCF_002850535 | <i>Bacillus siamensis</i>             |
| GCF_016313165 | <i>Bacillus siamensis</i>             |
| GCF_001050115 | <i>Bacillus smithii</i>               |
| GCF_002202015 | <i>Bacillus sonorensis</i>            |
| GCF_000242895 | <i>Bacillus</i> sp. 1NLA3E            |
| GCF_002269275 | <i>Bacillus</i> sp. 1s-1              |
| GCF_001999205 | <i>Bacillus</i> sp. 275               |
| GCF_017161885 | <i>Bacillus</i> sp. 3a                |
| GCF_019464555 | <i>Bacillus</i> sp. 7D3               |
| GCF_009861435 | <i>Bacillus</i> sp. A260              |
| GCF_001831375 | <i>Bacillus</i> sp. ABP14             |
| GCF_009906915 | <i>Bacillus</i> sp. AM1(2019)         |
| GCF_008274865 | <i>Bacillus</i> sp. AR4-2             |
| GCF_001679765 | <i>Bacillus</i> sp. B25               |
| GCF_007363175 | <i>Bacillus</i> sp. BD59S             |
| GCF_000827045 | <i>Bacillus</i> sp. BH072             |
| GCF_008432245 | <i>Bacillus</i> sp. BS98              |
| GCF_003355115 | <i>Bacillus</i> sp. COPE52            |
| GCF_003429245 | <i>Bacillus</i> sp. CR71              |
| GCF_012955605 | <i>Bacillus</i> sp. CS13              |
| GCF_011082085 | <i>Bacillus</i> sp. Cs-700            |
| GCF_003330965 | <i>Bacillus</i> sp. DM2               |
| GCF_009720625 | <i>Bacillus</i> sp. DSL-17            |
| GCF_004799705 | <i>Bacillus</i> sp. DU-106            |
| GCF_003429225 | <i>Bacillus</i> sp. E25               |
| GCF_002073415 | <i>Bacillus</i> sp. FDAARGOS_235      |
| GCF_003812125 | <i>Bacillus</i> sp. FDAARGOS_527      |
| GCF_001719225 | <i>Bacillus</i> sp. FJAT-14266        |
| GCF_001278805 | <i>Bacillus</i> sp. FJAT-18017        |
| GCF_001278755 | <i>Bacillus</i> sp. FJAT-22090        |
| GCF_003816055 | <i>Bacillus</i> sp. FJAT-42376        |
| GCF_002813025 | <i>Bacillus</i> sp. FJAT-45348        |
| GCF_001896025 | <i>Bacillus</i> sp. H15-1             |

---

---

|               |                                |
|---------------|--------------------------------|
| GCF_002833485 | <i>Bacillus</i> sp. HBCD-sjtu  |
| GCF_014960805 | <i>Bacillus</i> sp. HD4P25     |
| GCF_012572025 | <i>Bacillus</i> sp. HNA3       |
| GCF_001648135 | <i>Bacillus</i> sp. IHB B 7164 |
| GCF_008274905 | <i>Bacillus</i> sp. JAS24-2    |
| GCF_018861275 | <i>Bacillus</i> sp. JNUCC-22   |
| GCF_018885385 | <i>Bacillus</i> sp. JNUCC-24   |
| GCF_000259365 | <i>Bacillus</i> sp. JS         |
| GCF_005937795 | <i>Bacillus</i> sp. KBS0812    |
| GCF_011398925 | <i>Bacillus</i> sp. KH172YL63  |
| GCF_016924995 | <i>Bacillus</i> sp. LJBS06     |
| GCF_019334685 | <i>Bacillus</i> sp. LJBS17     |
| GCF_017797845 | <i>Bacillus</i> sp. LJBV19     |
| GCF_000978495 | <i>Bacillus</i> sp. LM 4-2     |
| GCF_011008975 | <i>Bacillus</i> sp. LUNF1      |
| GCF_002763675 | <i>Bacillus</i> sp. Lzh-5      |
| GCF_006965545 | <i>Bacillus</i> sp. M4U3P1     |
| GCF_002953915 | <i>Bacillus</i> sp. MBGLi79    |
| GCF_002201875 | <i>Bacillus</i> sp. MD-5       |
| GCF_009759805 | <i>Bacillus</i> sp. ms-22      |
| GCF_009818105 | <i>Bacillus</i> sp. N1-1       |
| GCF_009676825 | <i>Bacillus</i> sp. N3536      |
| GCF_018889975 | <i>Bacillus</i> sp. NP157      |
| GCF_000465465 | <i>Bacillus</i> sp. NSP9.1     |
| GCF_000829195 | <i>Bacillus</i> sp. OxB-1      |
| GCF_014302175 | <i>Bacillus</i> sp. PAMC22265  |
| GCF_014250375 | <i>Bacillus</i> sp. PAMC26543  |
| GCF_014235785 | <i>Bacillus</i> sp. PAMC26568  |
| GCF_014250435 | <i>Bacillus</i> sp. PAMC28571  |
| GCF_014250415 | <i>Bacillus</i> sp. PAMC28748  |
| GCF_000815145 | <i>Bacillus</i> sp. Pc3        |
| GCF_016919285 | <i>Bacillus</i> sp. PDNC022    |
| GCF_001816185 | <i>Bacillus</i> sp. RZ2MS9     |
| GCF_005154805 | <i>Bacillus</i> sp. S3         |
| GCF_000469135 | <i>Bacillus</i> sp. SB49       |
| GCF_001553895 | <i>Bacillus</i> sp. SDLI1      |
| GCF_008274885 | <i>Bacillus</i> sp. SH8-8      |
| GCF_002843505 | <i>Bacillus</i> sp. SJ-10      |
| GCF_003171815 | <i>Bacillus</i> sp. SUBG0010   |
| GCF_004322655 | <i>Bacillus</i> sp. SYJ        |
| GCF_009363695 | <i>Bacillus</i> sp. THAF10     |
| GCF_016653575 | <i>Bacillus</i> sp. TK-2       |
| GCF_015999585 | <i>Bacillus</i> sp. V3         |
| GCF_000800825 | <i>Bacillus</i> sp. WP8        |

---

---

|               |                              |
|---------------|------------------------------|
| GCF_004103875 | <i>Bacillus</i> sp. WR11     |
| GCF_000747345 | <i>Bacillus</i> sp. X1(2014) |
| GCF_003047225 | <i>Bacillus</i> sp. Y-01     |
| GCF_003586445 | <i>Bacillus</i> sp. Y1       |
| GCF_000877815 | <i>Bacillus</i> sp. YP1      |
| GCF_003047165 | <i>Bacillus</i> sp. ZY-1-1   |
| GCF_002269175 | <i>Bacillus subtilis</i>     |
| GCF_002269195 | <i>Bacillus subtilis</i>     |
| GCF_006165085 | <i>Bacillus subtilis</i>     |
| GCF_006364495 | <i>Bacillus subtilis</i>     |
| GCF_000952895 | <i>Bacillus subtilis</i>     |
| GCF_000953615 | <i>Bacillus subtilis</i>     |
| GCF_002290305 | <i>Bacillus subtilis</i>     |
| GCF_014879275 | <i>Bacillus subtilis</i>     |
| GCF_001015095 | <i>Bacillus subtilis</i>     |
| GCF_001037985 | <i>Bacillus subtilis</i>     |
| GCF_015535655 | <i>Bacillus subtilis</i>     |
| GCF_015602625 | <i>Bacillus subtilis</i>     |
| GCF_015654205 | <i>Bacillus subtilis</i>     |
| GCF_002893805 | <i>Bacillus subtilis</i>     |
| GCF_008831405 | <i>Bacillus subtilis</i>     |
| GCF_016065415 | <i>Bacillus subtilis</i>     |
| GCF_009017455 | <i>Bacillus subtilis</i>     |
| GCF_002982175 | <i>Bacillus subtilis</i>     |
| GCF_009363835 | <i>Bacillus subtilis</i>     |
| GCF_009497795 | <i>Bacillus subtilis</i>     |
| GCF_009497815 | <i>Bacillus subtilis</i>     |
| GCF_009662155 | <i>Bacillus subtilis</i>     |
| GCF_009662175 | <i>Bacillus subtilis</i>     |
| GCF_009662195 | <i>Bacillus subtilis</i>     |
| GCF_009662215 | <i>Bacillus subtilis</i>     |
| GCF_009662235 | <i>Bacillus subtilis</i>     |
| GCF_001604995 | <i>Bacillus subtilis</i>     |
| GCF_009662255 | <i>Bacillus subtilis</i>     |
| GCF_009662275 | <i>Bacillus subtilis</i>     |
| GCF_009662335 | <i>Bacillus subtilis</i>     |
| GCF_003148355 | <i>Bacillus subtilis</i>     |
| GCF_009662355 | <i>Bacillus subtilis</i>     |
| GCF_009662375 | <i>Bacillus subtilis</i>     |
| GCF_009662415 | <i>Bacillus subtilis</i>     |
| GCF_009662435 | <i>Bacillus subtilis</i>     |
| GCF_009662455 | <i>Bacillus subtilis</i>     |
| GCF_016894165 | <i>Bacillus subtilis</i>     |
| GCF_003184225 | <i>Bacillus subtilis</i>     |

---



---

|               |                          |
|---------------|--------------------------|
| GCF_009665145 | <i>Bacillus subtilis</i> |
| GCF_009676665 | <i>Bacillus subtilis</i> |
| GCF_001704095 | <i>Bacillus subtilis</i> |
| GCF_001720505 | <i>Bacillus subtilis</i> |
| GCF_009857115 | <i>Bacillus subtilis</i> |
| GCF_009866865 | <i>Bacillus subtilis</i> |
| GCF_009884005 | <i>Bacillus subtilis</i> |
| GCF_001746575 | <i>Bacillus subtilis</i> |
| GCF_009913255 | <i>Bacillus subtilis</i> |
| GCF_001747445 | <i>Bacillus subtilis</i> |
| GCF_009913275 | <i>Bacillus subtilis</i> |
| GCF_003610955 | <i>Bacillus subtilis</i> |
| GCF_001808235 | <i>Bacillus subtilis</i> |
| GCF_009913395 | <i>Bacillus subtilis</i> |
| GCF_009913515 | <i>Bacillus subtilis</i> |
| GCF_009913535 | <i>Bacillus subtilis</i> |
| GCF_009913555 | <i>Bacillus subtilis</i> |
| GCF_009913575 | <i>Bacillus subtilis</i> |
| GCF_009913595 | <i>Bacillus subtilis</i> |
| GCF_001889385 | <i>Bacillus subtilis</i> |
| GCF_001889625 | <i>Bacillus subtilis</i> |
| GCF_009914155 | <i>Bacillus subtilis</i> |
| GCF_001890405 | <i>Bacillus subtilis</i> |
| GCF_009937745 | <i>Bacillus subtilis</i> |
| GCF_001902555 | <i>Bacillus subtilis</i> |
| GCF_011765645 | <i>Bacillus subtilis</i> |
| GCF_004101345 | <i>Bacillus subtilis</i> |
| GCF_004101365 | <i>Bacillus subtilis</i> |
| GCF_004101405 | <i>Bacillus subtilis</i> |
| GCF_004101425 | <i>Bacillus subtilis</i> |
| GCF_004101445 | <i>Bacillus subtilis</i> |
| GCF_002055965 | <i>Bacillus subtilis</i> |
| GCF_004101465 | <i>Bacillus subtilis</i> |
| GCF_004101485 | <i>Bacillus subtilis</i> |
| GCF_004101565 | <i>Bacillus subtilis</i> |
| GCF_002072735 | <i>Bacillus subtilis</i> |
| GCF_004101945 | <i>Bacillus subtilis</i> |
| GCF_004103535 | <i>Bacillus subtilis</i> |
| GCF_012647565 | <i>Bacillus subtilis</i> |
| GCF_004103555 | <i>Bacillus subtilis</i> |
| GCF_004103595 | <i>Bacillus subtilis</i> |
| GCF_002096095 | <i>Bacillus subtilis</i> |
| GCF_000769515 | <i>Bacillus subtilis</i> |
| GCF_004119535 | <i>Bacillus subtilis</i> |

---



---

|               |                                                 |
|---------------|-------------------------------------------------|
| GCF_000772125 | <i>Bacillus subtilis</i>                        |
| GCF_004119555 | <i>Bacillus subtilis</i>                        |
| GCF_000772165 | <i>Bacillus subtilis</i>                        |
| GCF_000772205 | <i>Bacillus subtilis</i>                        |
| GCF_004119595 | <i>Bacillus subtilis</i>                        |
| GCF_002142595 | <i>Bacillus subtilis</i>                        |
| GCF_004119615 | <i>Bacillus subtilis</i>                        |
| GCF_000782835 | <i>Bacillus subtilis</i>                        |
| GCF_002163815 | <i>Bacillus subtilis</i>                        |
| GCF_004119635 | <i>Bacillus subtilis</i>                        |
| GCF_004119655 | <i>Bacillus subtilis</i>                        |
| GCF_000789295 | <i>Bacillus subtilis</i>                        |
| GCF_004119675 | <i>Bacillus subtilis</i>                        |
| GCF_004119695 | <i>Bacillus subtilis</i>                        |
| GCF_004119715 | <i>Bacillus subtilis</i>                        |
| GCF_004119775 | <i>Bacillus subtilis</i>                        |
| GCF_004119815 | <i>Bacillus subtilis</i>                        |
| GCF_004119835 | <i>Bacillus subtilis</i>                        |
| GCF_004119875 | <i>Bacillus subtilis</i>                        |
| GCF_013285325 | <i>Bacillus subtilis</i>                        |
| GCF_002202055 | <i>Bacillus subtilis</i>                        |
| GCF_002205435 | <i>Bacillus subtilis</i>                        |
| GCF_013347105 | <i>Bacillus subtilis</i>                        |
| GCF_002216085 | <i>Bacillus subtilis</i>                        |
| GCF_013388335 | <i>Bacillus subtilis</i>                        |
| GCF_002220075 | <i>Bacillus subtilis</i>                        |
| GCF_013393725 | <i>Bacillus subtilis</i>                        |
| GCF_005153965 | <i>Bacillus subtilis</i>                        |
| GCF_005160425 | <i>Bacillus subtilis</i>                        |
| GCF_005234095 | <i>Bacillus subtilis</i>                        |
| GCF_005849145 | <i>Bacillus subtilis</i>                        |
| GCF_014171535 | <i>Bacillus subtilis</i>                        |
| GCF_018394175 | <i>Bacillus subtilis</i> Strain: BYS2           |
| GCF_018141065 | <i>Bacillus subtilis</i> Strain: PMB102         |
| GCF_018224865 | <i>Bacillus subtilis</i> Strain: SC3.7          |
| GCF_003515125 | <i>Bacillus subtilis</i> Strain: FB6-3          |
| GCF_019464335 | <i>Bacillus subtilis</i> Strain: HD15           |
| GCF_018884165 | <i>Bacillus subtilis</i> Strain: s-16           |
| GCF_017753785 | <i>Bacillus subtilis</i> Strain: YB-04          |
| GCF_000523045 | <i>Bacillus subtilis</i> BEST7003               |
| GCF_000186745 | <i>Bacillus subtilis</i> BSn5                   |
| GCF_000973605 | <i>Bacillus subtilis</i> HJ5                    |
| GCF_000971925 | <i>Bacillus subtilis</i> KCTC 1028 = ATCC 6051a |
| GCF_000497485 | <i>Bacillus subtilis</i> PY79                   |

---

---

|               |                                                                       |
|---------------|-----------------------------------------------------------------------|
| GCF_000293765 | <i>Bacillus subtilis</i> QB928                                        |
| GCF_019599105 | <i>Bacillus subtilis</i> Strain: YPS-32                               |
| GCF_001597265 | <i>Bacillus subtilis</i> subsp. <i>globigii</i>                       |
| GCF_001565875 | <i>Bacillus subtilis</i> subsp. <i>natto</i>                          |
| GCF_000209795 | <i>Bacillus subtilis</i> subsp. <i>natto</i> BEST195                  |
| GCF_006094475 | <i>Bacillus subtilis</i> subsp. <i>spizizenii</i> ATCC 6633           |
| GCF_000146565 | <i>Bacillus subtilis</i> subsp. <i>spizizenii</i> str. W23            |
| GCF_000227465 | <i>Bacillus subtilis</i> subsp. <i>spizizenii</i> TU-B-10             |
| GCF_014298115 | <i>Bacillus subtilis</i> subsp. <i>subtilis</i>                       |
| GCF_006741845 | <i>Bacillus subtilis</i> subsp. <i>subtilis</i>                       |
| GCF_014961985 | <i>Bacillus subtilis</i> subsp. <i>subtilis</i>                       |
| GCF_001465815 | <i>Bacillus subtilis</i> subsp. <i>subtilis</i>                       |
| GCF_001541905 | <i>Bacillus subtilis</i> subsp. <i>subtilis</i>                       |
| GCF_001660525 | <i>Bacillus subtilis</i> subsp. <i>subtilis</i>                       |
| GCF_003426125 | <i>Bacillus subtilis</i> subsp. <i>subtilis</i>                       |
| GCF_001697265 | <i>Bacillus subtilis</i> subsp. <i>subtilis</i>                       |
| GCF_001703495 | <i>Bacillus subtilis</i> subsp. <i>subtilis</i>                       |
| GCF_001750745 | <i>Bacillus subtilis</i> subsp. <i>subtilis</i>                       |
| GCF_001750765 | <i>Bacillus subtilis</i> subsp. <i>subtilis</i>                       |
| GCF_003665195 | <i>Bacillus subtilis</i> subsp. <i>subtilis</i>                       |
| GCF_003665215 | <i>Bacillus subtilis</i> subsp. <i>subtilis</i>                       |
| GCF_003665235 | <i>Bacillus subtilis</i> subsp. <i>subtilis</i>                       |
| GCF_003665255 | <i>Bacillus subtilis</i> subsp. <i>subtilis</i>                       |
| GCF_003665275 | <i>Bacillus subtilis</i> subsp. <i>subtilis</i>                       |
| GCF_003665295 | <i>Bacillus subtilis</i> subsp. <i>subtilis</i>                       |
| GCF_003665315 | <i>Bacillus subtilis</i> subsp. <i>subtilis</i>                       |
| GCF_003665335 | <i>Bacillus subtilis</i> subsp. <i>subtilis</i>                       |
| GCF_003665355 | <i>Bacillus subtilis</i> subsp. <i>subtilis</i>                       |
| GCF_003665395 | <i>Bacillus subtilis</i> subsp. <i>subtilis</i>                       |
| GCF_012648205 | <i>Bacillus subtilis</i> subsp. <i>subtilis</i>                       |
| GCF_012648345 | <i>Bacillus subtilis</i> subsp. <i>subtilis</i>                       |
| GCF_002173615 | <i>Bacillus subtilis</i> subsp. <i>subtilis</i>                       |
| GCF_002173695 | <i>Bacillus subtilis</i> subsp. <i>subtilis</i>                       |
| GCF_002173715 | <i>Bacillus subtilis</i> subsp. <i>subtilis</i>                       |
| GCF_000827065 | <i>Bacillus subtilis</i> subsp. <i>subtilis</i>                       |
| GCF_002201955 | <i>Bacillus subtilis</i> subsp. <i>subtilis</i>                       |
| GCF_002201995 | <i>Bacillus subtilis</i> subsp. <i>subtilis</i>                       |
| GCF_002202035 | <i>Bacillus subtilis</i> subsp. <i>subtilis</i>                       |
| GCF_004328925 | <i>Bacillus subtilis</i> subsp. <i>subtilis</i>                       |
| GCF_018454405 | <i>Bacillus subtilis</i> subsp. <i>subtilis</i> Strain: A1 - Midalam  |
| GCF_000344745 | <i>Bacillus subtilis</i> subsp. <i>subtilis</i> 6051-HGW              |
| GCF_006088795 | <i>Bacillus subtilis</i> subsp. <i>subtilis</i> NCIB 3610 = ATCC 6051 |
| GCF_000186085 | <i>Bacillus subtilis</i> subsp. <i>subtilis</i> NCIB 3610 = ATCC 6051 |
| GCF_000009045 | <i>Bacillus subtilis</i> subsp. <i>subtilis</i> str. 168              |

---

---

|               |                                                                          |
|---------------|--------------------------------------------------------------------------|
| GCF_000155325 | <i>Bacillus subtilis</i> subsp. <i>subtilis</i> str. 168                 |
| GCF_002009095 | <i>Bacillus subtilis</i> subsp. <i>subtilis</i> str. 168                 |
| GCF_002009135 | <i>Bacillus subtilis</i> subsp. <i>subtilis</i> str. 168                 |
| GCF_012931705 | <i>Bacillus subtilis</i> subsp. <i>subtilis</i> str. 168                 |
| GCF_013009385 | <i>Bacillus subtilis</i> subsp. <i>subtilis</i> str. 168                 |
| GCF_000789275 | <i>Bacillus subtilis</i> subsp. <i>subtilis</i> str. 168                 |
| GCF_000699525 | <i>Bacillus subtilis</i> subsp. <i>subtilis</i> str. AG1839              |
| GCF_000349795 | <i>Bacillus subtilis</i> subsp. <i>subtilis</i> str. BAB-1               |
| GCF_000321395 | <i>Bacillus subtilis</i> subsp. <i>subtilis</i> str. BSP1                |
| GCF_000155355 | <i>Bacillus subtilis</i> subsp. <i>subtilis</i> str. JH642               |
| GCF_000699465 | <i>Bacillus subtilis</i> subsp. <i>subtilis</i> str. JH642 substr. AG174 |
| GCF_000706705 | <i>Bacillus subtilis</i> subsp. <i>subtilis</i> str. OH 131.1            |
| GCF_000227485 | <i>Bacillus subtilis</i> subsp. <i>subtilis</i> str. RO-NN-1             |
| GCF_000155375 | <i>Bacillus subtilis</i> subsp. <i>subtilis</i> str. SMY                 |
| GCF_012030675 | <i>Bacillus subtilis</i> subsp. <i>subtilis</i> str. SMY                 |
| GCF_018986855 | <i>Bacillus subtilis</i> subsp. <i>subtilis</i> Strain: Miz-8            |
| GCF_000737405 | <i>Bacillus subtilis</i> TO-A                                            |
| GCF_000338735 | <i>Bacillus subtilis</i> XF-1                                            |
| GCF_012225885 | <i>Bacillus tequilensis</i>                                              |
| GCF_006151925 | <i>Bacillus thuringiensis</i>                                            |
| GCF_001017635 | <i>Bacillus thuringiensis</i>                                            |
| GCF_001182785 | <i>Bacillus thuringiensis</i>                                            |
| GCF_001420855 | <i>Bacillus thuringiensis</i>                                            |
| GCF_001455345 | <i>Bacillus thuringiensis</i>                                            |
| GCF_009025915 | <i>Bacillus thuringiensis</i>                                            |
| GCF_016070565 | <i>Bacillus thuringiensis</i>                                            |
| GCF_009224065 | <i>Bacillus thuringiensis</i>                                            |
| GCF_001595725 | <i>Bacillus thuringiensis</i>                                            |
| GCF_003054785 | <i>Bacillus thuringiensis</i>                                            |
| GCF_001598095 | <i>Bacillus thuringiensis</i>                                            |
| GCF_001618665 | <i>Bacillus thuringiensis</i>                                            |
| GCF_001685565 | <i>Bacillus thuringiensis</i>                                            |
| GCF_001692675 | <i>Bacillus thuringiensis</i>                                            |
| GCF_003626955 | <i>Bacillus thuringiensis</i>                                            |
| GCF_003991175 | <i>Bacillus thuringiensis</i>                                            |
| GCF_002025105 | <i>Bacillus thuringiensis</i>                                            |
| GCF_002119445 | <i>Bacillus thuringiensis</i>                                            |
| GCF_013267295 | <i>Bacillus thuringiensis</i>                                            |
| GCF_002173755 | <i>Bacillus thuringiensis</i>                                            |
| GCF_013267315 | <i>Bacillus thuringiensis</i>                                            |
| GCF_013267335 | <i>Bacillus thuringiensis</i>                                            |
| GCF_002184245 | <i>Bacillus thuringiensis</i>                                            |
| GCF_002192515 | <i>Bacillus thuringiensis</i>                                            |
| GCF_013267795 | <i>Bacillus thuringiensis</i>                                            |

---

---

|               |                                                                       |
|---------------|-----------------------------------------------------------------------|
| GCF_013267815 | <i>Bacillus thuringiensis</i>                                         |
| GCF_004194435 | <i>Bacillus thuringiensis</i>                                         |
| GCF_004194455 | <i>Bacillus thuringiensis</i>                                         |
| GCF_004194475 | <i>Bacillus thuringiensis</i>                                         |
| GCF_000832485 | <i>Bacillus thuringiensis</i>                                         |
| GCF_013340745 | <i>Bacillus thuringiensis</i>                                         |
| GCF_013343075 | <i>Bacillus thuringiensis</i>                                         |
| GCF_004354265 | <i>Bacillus thuringiensis</i>                                         |
| GCF_000832825 | <i>Bacillus thuringiensis</i>                                         |
| GCF_002222555 | <i>Bacillus thuringiensis</i>                                         |
| GCF_005155285 | <i>Bacillus thuringiensis</i>                                         |
| GCF_000832925 | <i>Bacillus thuringiensis</i>                                         |
| GCF_000833085 | <i>Bacillus thuringiensis</i>                                         |
| GCF_017751245 | <i>Bacillus thuringiensis</i> Strain: Bt-GS57                         |
| GCF_017378115 | <i>Bacillus thuringiensis</i> Strain: TAND672                         |
| GCF_000092165 | <i>Bacillus thuringiensis</i> BMB171                                  |
| GCF_001721165 | <i>Bacillus thuringiensis</i> Bt18247                                 |
| GCF_000161495 | <i>Bacillus thuringiensis</i> Bt407                                   |
| GCF_000306745 | <i>Bacillus thuringiensis</i> Bt407                                   |
| GCF_000342025 | <i>Bacillus thuringiensis</i> DAR 81934                               |
| GCF_000835025 | <i>Bacillus thuringiensis</i> HD1002                                  |
| GCF_000292455 | <i>Bacillus thuringiensis</i> HD-771                                  |
| GCF_000292705 | <i>Bacillus thuringiensis</i> HD-789                                  |
| GCF_000161715 | <i>Bacillus thuringiensis</i> IBL 200                                 |
| GCF_000161735 | <i>Bacillus thuringiensis</i> IBL 4222                                |
| GCF_003546665 | <i>Bacillus thuringiensis</i> LM1212                                  |
| GCF_000300475 | <i>Bacillus thuringiensis</i> MC28                                    |
| GCF_001640965 | <i>Bacillus thuringiensis</i> serovar <i>alesti</i>                   |
| GCF_012222085 | <i>Bacillus thuringiensis</i> serovar <i>andalousiensis</i>           |
| GCF_000161635 | <i>Bacillus thuringiensis</i> serovar <i>andalousiensis</i> BGSC 4AW1 |
| GCF_000161615 | <i>Bacillus thuringiensis</i> serovar <i>berliner</i> ATCC 10792      |
| GCF_000193355 | <i>Bacillus thuringiensis</i> serovar <i>chinensis</i> CT-43          |
| GCF_000803665 | <i>Bacillus thuringiensis</i> serovar <i>galleriae</i>                |
| GCF_000161675 | <i>Bacillus thuringiensis</i> serovar <i>huazhongensis</i> BGSC 4BD1  |
| GCF_001183785 | <i>Bacillus thuringiensis</i> serovar <i>indiana</i>                  |
| GCF_003445395 | <i>Bacillus thuringiensis</i> serovar <i>israelensis</i>              |
| GCF_013113775 | <i>Bacillus thuringiensis</i> serovar <i>israelensis</i>              |
| GCF_000835235 | <i>Bacillus thuringiensis</i> serovar <i>kurstaki</i>                 |
| GCF_000717535 | <i>Bacillus thuringiensis</i> serovar <i>kurstaki</i> str. HD-1       |
| GCF_000338755 | <i>Bacillus thuringiensis</i> serovar <i>kurstaki</i> str. HD73       |
| GCF_000161575 | <i>Bacillus thuringiensis</i> serovar <i>kurstaki</i> str. T03a001    |
| GCF_000688795 | <i>Bacillus thuringiensis</i> serovar <i>kurstaki</i> str. YBT-1520   |

---

---

|               |                                                                        |
|---------------|------------------------------------------------------------------------|
| GCF_000747545 | <i>Bacillus thuringiensis</i> serovar <i>kurstaki</i> str. YBT-1520    |
| GCF_000161595 | <i>Bacillus thuringiensis</i> serovar <i>monterrey</i> BGSC 4AJ1       |
| GCF_000940785 | <i>Bacillus thuringiensis</i> serovar <i>morrisoni</i>                 |
| GCF_000161555 | <i>Bacillus thuringiensis</i> serovar <i>pakistani</i> str. T13001     |
| GCF_000161655 | <i>Bacillus thuringiensis</i> serovar <i>pondicheriensis</i> BGSC 4BA1 |
| GCF_000161695 | <i>Bacillus thuringiensis</i> serovar <i>pulsiensis</i> BGSC 4CC1      |
| GCF_000341665 | <i>Bacillus thuringiensis</i> serovar <i>thuringiensis</i> str. IS5056 |
| GCF_000161515 | <i>Bacillus thuringiensis</i> serovar <i>thuringiensis</i> str. T01001 |
| GCF_001548175 | <i>Bacillus thuringiensis</i> serovar <i>tolworthi</i>                 |
| GCF_000015065 | <i>Bacillus thuringiensis</i> str. Al Hakam                            |
| GCF_018885365 | <i>Bacillus thuringiensis</i> Strain: GR007                            |
| GCF_000497525 | <i>Bacillus thuringiensis</i> YBT-1518                                 |
| GCF_016605985 | <i>Bacillus toyonensis</i>                                             |
| GCF_018739605 | <i>Bacillus toyonensis</i> Strain: BPN45/4                             |
| GCF_018741125 | <i>Bacillus toyonensis</i> Strain: JAS03/3                             |
| GCF_018741545 | <i>Bacillus toyonensis</i> Strain: JAS22/1                             |
| GCF_018741525 | <i>Bacillus toyonensis</i> Strain: JAS13/1                             |
| GCF_000496285 | <i>Bacillus toyonensis</i> BCT-7112                                    |
| GCF_018741625 | <i>Bacillus toyonensis</i> Strain: JAS411                              |
| GCF_016026855 | <i>Bacillus tropicus</i>                                               |
| GCF_016027575 | <i>Bacillus tropicus</i>                                               |
| GCF_011040455 | <i>Bacillus tropicus</i>                                               |
| GCF_013331815 | <i>Bacillus tropicus</i>                                               |
| GCF_018141085 | <i>Bacillus tropicus</i> Strain: LM1212-DB                             |
| GCF_003667885 | <i>Bacillus vallismortis</i>                                           |
| GCF_004116955 | <i>Bacillus vallismortis</i>                                           |
| GCF_002113805 | <i>Bacillus vallismortis</i>                                           |
| GCF_000875875 | <i>Bacillus velezensis</i>                                             |
| GCF_014358035 | <i>Bacillus velezensis</i>                                             |
| GCF_002290045 | <i>Bacillus velezensis</i>                                             |
| GCF_006489235 | <i>Bacillus velezensis</i>                                             |
| GCF_014495825 | <i>Bacillus velezensis</i>                                             |
| GCF_006489255 | <i>Bacillus velezensis</i>                                             |
| GCF_006489275 | <i>Bacillus velezensis</i>                                             |
| GCF_014622705 | <i>Bacillus velezensis</i>                                             |
| GCF_002310315 | <i>Bacillus velezensis</i>                                             |
| GCF_002327165 | <i>Bacillus velezensis</i>                                             |
| GCF_000973485 | <i>Bacillus velezensis</i>                                             |
| GCF_014706595 | <i>Bacillus velezensis</i>                                             |
| GCF_014764325 | <i>Bacillus velezensis</i>                                             |
| GCF_006965525 | <i>Bacillus velezensis</i>                                             |
| GCF_014841075 | <i>Bacillus velezensis</i>                                             |
| GCF_000987825 | <i>Bacillus velezensis</i>                                             |

---

---

|               |                            |
|---------------|----------------------------|
| GCF_006974185 | <i>Bacillus velezensis</i> |
| GCF_000988345 | <i>Bacillus velezensis</i> |
| GCF_002556565 | <i>Bacillus velezensis</i> |
| GCF_002688525 | <i>Bacillus velezensis</i> |
| GCF_001023595 | <i>Bacillus velezensis</i> |
| GCF_002741705 | <i>Bacillus velezensis</i> |
| GCF_014961825 | <i>Bacillus velezensis</i> |
| GCF_002761535 | <i>Bacillus velezensis</i> |
| GCF_002764075 | <i>Bacillus velezensis</i> |
| GCF_015239615 | <i>Bacillus velezensis</i> |
| GCF_002796465 | <i>Bacillus velezensis</i> |
| GCF_015277495 | <i>Bacillus velezensis</i> |
| GCF_015291865 | <i>Bacillus velezensis</i> |
| GCF_008244925 | <i>Bacillus velezensis</i> |
| GCF_002844125 | <i>Bacillus velezensis</i> |
| GCF_002845365 | <i>Bacillus velezensis</i> |
| GCF_002850475 | <i>Bacillus velezensis</i> |
| GCF_008367895 | <i>Bacillus velezensis</i> |
| GCF_015732475 | <i>Bacillus velezensis</i> |
| GCF_002893845 | <i>Bacillus velezensis</i> |
| GCF_002944585 | <i>Bacillus velezensis</i> |
| GCF_008727675 | <i>Bacillus velezensis</i> |
| GCF_008802875 | <i>Bacillus velezensis</i> |
| GCF_001536925 | <i>Bacillus velezensis</i> |
| GCF_002968415 | <i>Bacillus velezensis</i> |
| GCF_016065635 | <i>Bacillus velezensis</i> |
| GCF_002993245 | <i>Bacillus velezensis</i> |
| GCF_009362235 | <i>Bacillus velezensis</i> |
| GCF_003045165 | <i>Bacillus velezensis</i> |
| GCF_016406185 | <i>Bacillus velezensis</i> |
| GCF_001593395 | <i>Bacillus velezensis</i> |
| GCF_003047005 | <i>Bacillus velezensis</i> |
| GCF_016415725 | <i>Bacillus velezensis</i> |
| GCF_003047025 | <i>Bacillus velezensis</i> |
| GCF_003047045 | <i>Bacillus velezensis</i> |
| GCF_016766595 | <i>Bacillus velezensis</i> |
| GCF_003071465 | <i>Bacillus velezensis</i> |
| GCF_003073255 | <i>Bacillus velezensis</i> |
| GCF_003073455 | <i>Bacillus velezensis</i> |
| GCF_003076535 | <i>Bacillus velezensis</i> |
| GCF_016801735 | <i>Bacillus velezensis</i> |
| GCF_016834435 | <i>Bacillus velezensis</i> |
| GCF_016859395 | <i>Bacillus velezensis</i> |
| GCF_016888865 | <i>Bacillus velezensis</i> |

---



---

|               |                            |
|---------------|----------------------------|
| GCF_003150855 | <i>Bacillus velezensis</i> |
| GCF_009663035 | <i>Bacillus velezensis</i> |
| GCF_016904925 | <i>Bacillus velezensis</i> |
| GCF_009664145 | <i>Bacillus velezensis</i> |
| GCF_003184945 | <i>Bacillus velezensis</i> |
| GCF_003265265 | <i>Bacillus velezensis</i> |
| GCF_003285085 | <i>Bacillus velezensis</i> |
| GCF_009738165 | <i>Bacillus velezensis</i> |
| GCF_003390415 | <i>Bacillus velezensis</i> |
| GCF_001685645 | <i>Bacillus velezensis</i> |
| GCF_009789615 | <i>Bacillus velezensis</i> |
| GCF_001687745 | <i>Bacillus velezensis</i> |
| GCF_003431885 | <i>Bacillus velezensis</i> |
| GCF_003432425 | <i>Bacillus velezensis</i> |
| GCF_003441635 | <i>Bacillus velezensis</i> |
| GCF_009834085 | <i>Bacillus velezensis</i> |
| GCF_003546955 | <i>Bacillus velezensis</i> |
| GCF_009856975 | <i>Bacillus velezensis</i> |
| GCF_003555525 | <i>Bacillus velezensis</i> |
| GCF_001723585 | <i>Bacillus velezensis</i> |
| GCF_003573875 | <i>Bacillus velezensis</i> |
| GCF_009913295 | <i>Bacillus velezensis</i> |
| GCF_003612755 | <i>Bacillus velezensis</i> |
| GCF_009913315 | <i>Bacillus velezensis</i> |
| GCF_001752685 | <i>Bacillus velezensis</i> |
| GCF_009913335 | <i>Bacillus velezensis</i> |
| GCF_009913355 | <i>Bacillus velezensis</i> |
| GCF_009913375 | <i>Bacillus velezensis</i> |
| GCF_001854345 | <i>Bacillus velezensis</i> |
| GCF_009913475 | <i>Bacillus velezensis</i> |
| GCF_009913495 | <i>Bacillus velezensis</i> |
| GCF_001857985 | <i>Bacillus velezensis</i> |
| GCF_009914135 | <i>Bacillus velezensis</i> |
| GCF_003667745 | <i>Bacillus velezensis</i> |
| GCF_009914175 | <i>Bacillus velezensis</i> |
| GCF_009931675 | <i>Bacillus velezensis</i> |
| GCF_003721475 | <i>Bacillus velezensis</i> |
| GCF_003854915 | <i>Bacillus velezensis</i> |
| GCF_003855275 | <i>Bacillus velezensis</i> |
| GCF_003860445 | <i>Bacillus velezensis</i> |
| GCF_011032725 | <i>Bacillus velezensis</i> |
| GCF_011100445 | <i>Bacillus velezensis</i> |
| GCF_011769925 | <i>Bacillus velezensis</i> |
| GCF_002005345 | <i>Bacillus velezensis</i> |

---



---

|               |                                          |
|---------------|------------------------------------------|
| GCF_011784665 | <i>Bacillus velezensis</i>               |
| GCF_012226065 | <i>Bacillus velezensis</i>               |
| GCF_002057535 | <i>Bacillus velezensis</i>               |
| GCF_002072695 | <i>Bacillus velezensis</i>               |
| GCF_004101805 | <i>Bacillus velezensis</i>               |
| GCF_012275165 | <i>Bacillus velezensis</i>               |
| GCF_012647845 | <i>Bacillus velezensis</i>               |
| GCF_002105595 | <i>Bacillus velezensis</i>               |
| GCF_000769555 | <i>Bacillus velezensis</i>               |
| GCF_002117165 | <i>Bacillus velezensis</i>               |
| GCF_004119575 | <i>Bacillus velezensis</i>               |
| GCF_013122275 | <i>Bacillus velezensis</i>               |
| GCF_013201135 | <i>Bacillus velezensis</i>               |
| GCF_013201465 | <i>Bacillus velezensis</i>               |
| GCF_004119735 | <i>Bacillus velezensis</i>               |
| GCF_000815275 | <i>Bacillus velezensis</i>               |
| GCF_002192235 | <i>Bacillus velezensis</i>               |
| GCF_004119855 | <i>Bacillus velezensis</i>               |
| GCF_004135455 | <i>Bacillus velezensis</i>               |
| GCF_002205715 | <i>Bacillus velezensis</i>               |
| GCF_004329055 | <i>Bacillus velezensis</i>               |
| GCF_004331895 | <i>Bacillus velezensis</i>               |
| GCF_004337655 | <i>Bacillus velezensis</i>               |
| GCF_013348705 | <i>Bacillus velezensis</i>               |
| GCF_013367755 | <i>Bacillus velezensis</i>               |
| GCF_002216755 | <i>Bacillus velezensis</i>               |
| GCF_004799565 | <i>Bacillus velezensis</i>               |
| GCF_013401395 | <i>Bacillus velezensis</i>               |
| GCF_013694265 | <i>Bacillus velezensis</i>               |
| GCF_002237515 | <i>Bacillus velezensis</i>               |
| GCF_013701805 | <i>Bacillus velezensis</i>               |
| GCF_002238395 | <i>Bacillus velezensis</i>               |
| GCF_013875015 | <i>Bacillus velezensis</i>               |
| GCF_002243325 | <i>Bacillus velezensis</i>               |
| GCF_005696395 | <i>Bacillus velezensis</i>               |
| GCF_000833005 | <i>Bacillus velezensis</i>               |
| GCF_014048285 | <i>Bacillus velezensis</i>               |
| GCF_014048385 | <i>Bacillus velezensis</i>               |
| GCF_014117505 | <i>Bacillus velezensis</i>               |
| GCF_014180705 | <i>Bacillus velezensis</i>               |
| GCF_014211995 | <i>Bacillus velezensis</i>               |
| GCF_017347625 | <i>Bacillus velezensis</i> Strain: AD-3  |
| GCF_017742975 | <i>Bacillus velezensis</i> Strain: AD8   |
| GCF_019222745 | <i>Bacillus velezensis</i> Strain: BS-G1 |

---

---

|               |                                            |
|---------------|--------------------------------------------|
| GCF_009734085 | <i>Bacillus velezensis</i> Strain: GA1     |
| GCF_019334525 | <i>Bacillus velezensis</i> Strain: LABIM44 |
| GCF_019285615 | <i>Bacillus velezensis</i> Strain: LBY-1   |
| GCF_018415955 | <i>Bacillus velezensis</i> Strain: VTX20   |
| GCF_017948225 | <i>Bacillus velezensis</i> Strain: VY03    |
| GCF_019464595 | <i>Bacillus velezensis</i> Strain: WB      |
| GCF_018223705 | <i>Bacillus velezensis</i> Strain: Y816    |
| GCF_019163475 | <i>Bacillus velezensis</i> Strain: YYC     |
| GCF_019551675 | <i>Bacillus velezensis</i> Strain: 19573-3 |
| GCF_018866365 | <i>Bacillus velezensis</i> Strain: GMEKP1  |
| GCF_018775385 | <i>Bacillus velezensis</i> Strain: J17-4   |
| GCF_018406485 | <i>Bacillus velezensis</i> Strain: KOF112  |
| GCF_018732185 | <i>Bacillus velezensis</i> Strain: NZ4     |
| GCF_018771705 | <i>Bacillus velezensis</i> Strain: US1     |
| GCF_018629015 | <i>Bacillus velezensis</i> Strain: VCN56   |
| GCF_018398955 | <i>Bacillus velezensis</i> Strain: VTX9    |
| GCF_000319475 | <i>Bacillus velezensis</i> AS43.3          |
| GCF_000283695 | <i>Bacillus velezensis</i> CAU B946        |
| GCF_000015785 | <i>Bacillus velezensis</i> FZB42           |
| GCF_000493375 | <i>Bacillus velezensis</i> NAU-B3          |
| GCF_000973585 | <i>Bacillus velezensis</i> NJN-6           |
| GCF_000685725 | <i>Bacillus velezensis</i> SQR9            |
| GCF_019449395 | <i>Bacillus velezensis</i> Strain: GS-1    |
| GCF_018278845 | <i>Bacillus velezensis</i> Strain: JK19    |
| GCF_018771665 | <i>Bacillus velezensis</i> Strain: Q12     |
| GCF_000583065 | <i>Bacillus velezensis</i> TrigoCor1448    |
| GCF_000455565 | <i>Bacillus velezensis</i> UCMB5033        |
| GCF_000341875 | <i>Bacillus velezensis</i> UCMB5036        |
| GCF_000455585 | <i>Bacillus velezensis</i> UCMB5113        |
| GCF_000284395 | <i>Bacillus velezensis</i> YAU B9601-Y2    |
| GCF_001889165 | <i>Bacillus weihaiensis</i>                |
| GCF_000160955 | <i>Bacillus wiedmannii</i>                 |
| GCF_008807735 | <i>Bacillus wiedmannii</i>                 |
| GCF_018741285 | <i>Bacillus wiedmannii</i> Strain: JAS07/5 |
| GCF_018741405 | <i>Bacillus wiedmannii</i> Strain: JAS08/1 |
| GCF_018741585 | <i>Bacillus wiedmannii</i> Strain: JAS28/2 |
| GCF_001857925 | <i>Bacillus xiamenensis</i>                |

---

**Table S2.** Number of *SrfAA*, *SrfAB* and *SrfAC* genes in 999 *Bacillus* species genomes.

| Accession Number | Species                     | <i>SrfA</i><br><i>A</i> | <i>SrfA</i><br><i>B</i> | <i>SrfA</i><br><i>C</i> |
|------------------|-----------------------------|-------------------------|-------------------------|-------------------------|
| GCF_004101925    | <i>Bacillus aerophilus</i>  | 2                       | 3                       | 6                       |
| GCF_009740005    | <i>Bacillus albus</i>       | 8                       | 5                       | 8                       |
| GCF_000972685    | <i>Bacillus altitudinis</i> | 4                       | 4                       | 7                       |
| GCF_002443015    | <i>Bacillus altitudinis</i> | 7                       | 4                       | 6                       |
| GCF_002741745    | <i>Bacillus altitudinis</i> | 4                       | 4                       | 5                       |
| GCF_007923025    | <i>Bacillus altitudinis</i> | 7                       | 5                       | 3                       |
| GCF_015160895    | <i>Bacillus altitudinis</i> | 5                       | 4                       | 5                       |
| GCF_001191605    | <i>Bacillus altitudinis</i> | 4                       | 3                       | 4                       |
| GCF_001431145    | <i>Bacillus altitudinis</i> | 3                       | 4                       | 5                       |
| GCF_001431785    | <i>Bacillus altitudinis</i> | 0                       | 0                       | 0                       |
| GCF_001543165    | <i>Bacillus altitudinis</i> | 4                       | 3                       | 4                       |
| GCF_016767855    | <i>Bacillus altitudinis</i> | 3                       | 4                       | 5                       |
| GCF_016807685    | <i>Bacillus altitudinis</i> | 3                       | 4                       | 7                       |
| GCF_001700735    | <i>Bacillus altitudinis</i> | 0                       | 0                       | 0                       |
| GCF_000299555    | <i>Bacillus altitudinis</i> | 4                       | 4                       | 7                       |
| GCF_001908475    | <i>Bacillus altitudinis</i> | 2                       | 2                       | 1                       |
| GCF_011067205    | <i>Bacillus altitudinis</i> | 2                       | 4                       | 5                       |
| GCF_013283915    | <i>Bacillus altitudinis</i> | 6                       | 5                       | 4                       |
| GCF_013307105    | <i>Bacillus altitudinis</i> | 1                       | 1                       | 1                       |
| GCF_004563755    | <i>Bacillus altitudinis</i> | 5                       | 4                       | 7                       |

|                   |                                             |    |    |    |
|-------------------|---------------------------------------------|----|----|----|
| GCF_005849<br>435 | <i>Bacillus altitudinis</i>                 | 6  | 4  | 7  |
| GCF_006007<br>905 | <i>Bacillus altitudinis</i>                 | 6  | 2  | 4  |
| GCF_017948<br>365 | <i>Bacillus altitudinis</i> Strain: 6ww6    | 4  | 4  | 2  |
| GCF_015689<br>015 | <i>Bacillus altitudinis</i> Strain: Ba1449  | 2  | 3  | 3  |
| GCF_017161<br>205 | <i>Bacillus altitudinis</i> Strain: 1817    | 3  | 4  | 5  |
| GCF_019164<br>215 | <i>Bacillus altitudinis</i> Strain: LZIP 02 | 5  | 4  | 7  |
| GCF_019355<br>135 | <i>Bacillus altitudinis</i> Strain: SCU11   | 1  | 1  | 0  |
| GCF_014622<br>745 | <i>Bacillus amyloliquefaciens</i>           | 0  | 0  | 1  |
| GCF_014791<br>945 | <i>Bacillus amyloliquefaciens</i>           | 1  | 0  | 0  |
| GCF_014792<br>065 | <i>Bacillus amyloliquefaciens</i>           | 16 | 8  | 5  |
| GCF_014854<br>735 | <i>Bacillus amyloliquefaciens</i>           | 11 | 11 | 8  |
| GCF_007362<br>635 | <i>Bacillus amyloliquefaciens</i>           | 2  | 0  | 0  |
| GCF_014930<br>895 | <i>Bacillus amyloliquefaciens</i>           | 14 | 12 | 10 |
| GCF_007827<br>165 | <i>Bacillus amyloliquefaciens</i>           | 0  | 0  | 0  |
| GCF_007923<br>205 | <i>Bacillus amyloliquefaciens</i>           | 11 | 16 | 10 |
| GCF_008534<br>375 | <i>Bacillus amyloliquefaciens</i>           | 1  | 2  | 0  |
| GCF_015999<br>565 | <i>Bacillus amyloliquefaciens</i>           | 0  | 0  | 0  |
| GCF_001483<br>885 | <i>Bacillus amyloliquefaciens</i>           | 8  | 17 | 9  |
| GCF_008808<br>015 | <i>Bacillus amyloliquefaciens</i>           | 5  | 0  | 1  |
| GCF_008824<br>205 | <i>Bacillus amyloliquefaciens</i>           | 8  | 13 | 5  |
| GCF_001586<br>105 | <i>Bacillus amyloliquefaciens</i>           | 1  | 1  | 0  |
| GCF_001596<br>755 | <i>Bacillus amyloliquefaciens</i>           | 12 | 12 | 11 |

|                   |                                                  |    |    |    |
|-------------------|--------------------------------------------------|----|----|----|
| GCF_003149<br>695 | <i>Bacillus amyloliquefaciens</i>                | 6  | 4  | 0  |
| GCF_003149<br>715 | <i>Bacillus amyloliquefaciens</i>                | 13 | 14 | 12 |
| GCF_003149<br>795 | <i>Bacillus amyloliquefaciens</i>                | 4  | 3  | 0  |
| GCF_003312<br>895 | <i>Bacillus amyloliquefaciens</i>                | 10 | 12 | 5  |
| GCF_001705<br>195 | <i>Bacillus amyloliquefaciens</i>                | 10 | 7  | 11 |
| GCF_001874<br>385 | <i>Bacillus amyloliquefaciens</i>                | 9  | 15 | 10 |
| GCF_001889<br>285 | <i>Bacillus amyloliquefaciens</i>                | 9  | 12 | 7  |
| GCF_001922<br>005 | <i>Bacillus amyloliquefaciens</i>                | 1  | 0  | 0  |
| GCF_003868<br>675 | <i>Bacillus amyloliquefaciens</i>                | 11 | 10 | 10 |
| GCF_004006<br>115 | <i>Bacillus amyloliquefaciens</i>                | 0  | 0  | 0  |
| GCF_013122<br>255 | <i>Bacillus amyloliquefaciens</i>                | 1  | 2  | 0  |
| GCF_002173<br>635 | <i>Bacillus amyloliquefaciens</i>                | 2  | 1  | 1  |
| GCF_013328<br>835 | <i>Bacillus amyloliquefaciens</i>                | 4  | 3  | 2  |
| GCF_013341<br>255 | <i>Bacillus amyloliquefaciens</i>                | 14 | 14 | 4  |
| GCF_002209<br>305 | <i>Bacillus amyloliquefaciens</i>                | 10 | 7  | 10 |
| GCF_004421<br>045 | <i>Bacillus amyloliquefaciens</i>                | 1  | 0  | 0  |
| GCF_019396<br>925 | <i>Bacillus amyloliquefaciens</i> Strain: GKT04  | 1  | 1  | 0  |
| GCF_018223<br>605 | <i>Bacillus amyloliquefaciens</i> Strain: Ba13   | 7  | 8  | 10 |
| GCF_017357<br>905 | <i>Bacillus amyloliquefaciens</i> Strain: GXU-1  | 5  | 5  | 2  |
| GCF_018363<br>035 | <i>Bacillus amyloliquefaciens</i> Strain: L-17   | 0  | 0  | 0  |
| GCF_018502<br>525 | <i>Bacillus amyloliquefaciens</i> Strain: SN16-1 | 0  | 0  | 0  |
| GCF_000494<br>835 | <i>Bacillus amyloliquefaciens</i> CC178          | 2  | 0  | 0  |

|                   |                                                         |    |    |    |
|-------------------|---------------------------------------------------------|----|----|----|
| GCF_000196<br>735 | <i>Bacillus amyloliquefaciens</i> DSM 7 = ATCC<br>23350 | 8  | 7  | 5  |
| GCF_000242<br>855 | <i>Bacillus amyloliquefaciens</i> IT-45                 | 10 | 16 | 13 |
| GCF_000835<br>145 | <i>Bacillus amyloliquefaciens</i> KHG19                 | 14 | 11 | 10 |
| GCF_000508<br>265 | <i>Bacillus amyloliquefaciens</i> LFB112                | 15 | 17 | 8  |
| GCF_000204<br>275 | <i>Bacillus amyloliquefaciens</i> LL3                   | 4  | 2  | 4  |
| GCF_017815<br>555 | <i>Bacillus amyloliquefaciens</i> Strain: G10           | 0  | 0  | 0  |
| GCF_017603<br>845 | <i>Bacillus amyloliquefaciens</i> Strain: XJ5           | 7  | 4  | 2  |
| GCF_000195<br>515 | <i>Bacillus amyloliquefaciens</i> TA208                 | 7  | 6  | 11 |
| GCF_001593<br>785 | <i>Bacillus amyloliquefaciens</i> UMAF6614              | 16 | 11 | 10 |
| GCF_001593<br>765 | <i>Bacillus amyloliquefaciens</i> UMAF6639              | 16 | 15 | 9  |
| GCF_000221<br>645 | <i>Bacillus amyloliquefaciens</i> XH7                   | 1  | 0  | 0  |
| GCF_000262<br>385 | <i>Bacillus amyloliquefaciens</i> Y2                    | 13 | 16 | 12 |
| GCF_006088<br>855 | <i>Bacillus anthracis</i>                               | 0  | 0  | 0  |
| GCF_014249<br>775 | <i>Bacillus anthracis</i>                               | 0  | 0  | 1  |
| GCF_000875<br>715 | <i>Bacillus anthracis</i>                               | 0  | 0  | 0  |
| GCF_002277<br>915 | <i>Bacillus anthracis</i>                               | 0  | 0  | 0  |
| GCF_002356<br>575 | <i>Bacillus anthracis</i>                               | 0  | 1  | 0  |
| GCF_006742<br>565 | <i>Bacillus anthracis</i>                               | 0  | 0  | 0  |
| GCF_001277<br>955 | <i>Bacillus anthracis</i>                               | 1  | 0  | 0  |
| GCF_001543<br>225 | <i>Bacillus anthracis</i>                               | 0  | 0  | 0  |
| GCF_002980<br>615 | <i>Bacillus anthracis</i>                               | 0  | 0  | 0  |
| GCF_001654<br>475 | <i>Bacillus anthracis</i>                               | 1  | 0  | 0  |

|                   |                           |   |   |   |
|-------------------|---------------------------|---|---|---|
| GCF_001683<br>065 | <i>Bacillus anthracis</i> | 0 | 0 | 0 |
| GCF_001683<br>095 | <i>Bacillus anthracis</i> | 0 | 0 | 0 |
| GCF_001683<br>135 | <i>Bacillus anthracis</i> | 0 | 0 | 0 |
| GCF_003227<br>955 | <i>Bacillus anthracis</i> | 1 | 0 | 0 |
| GCF_001683<br>155 | <i>Bacillus anthracis</i> | 0 | 0 | 0 |
| GCF_001683<br>175 | <i>Bacillus anthracis</i> | 0 | 0 | 0 |
| GCF_001683<br>195 | <i>Bacillus anthracis</i> | 0 | 0 | 0 |
| GCF_001683<br>215 | <i>Bacillus anthracis</i> | 0 | 0 | 0 |
| GCF_001683<br>235 | <i>Bacillus anthracis</i> | 0 | 0 | 0 |
| GCF_001683<br>255 | <i>Bacillus anthracis</i> | 0 | 0 | 0 |
| GCF_001683<br>275 | <i>Bacillus anthracis</i> | 0 | 0 | 0 |
| GCF_001683<br>295 | <i>Bacillus anthracis</i> | 0 | 0 | 0 |
| GCF_003410<br>255 | <i>Bacillus anthracis</i> | 4 | 2 | 5 |
| GCF_003410<br>355 | <i>Bacillus anthracis</i> | 6 | 1 | 7 |
| GCF_009806<br>595 | <i>Bacillus anthracis</i> | 0 | 0 | 0 |
| GCF_009806<br>615 | <i>Bacillus anthracis</i> | 0 | 0 | 0 |
| GCF_009806<br>635 | <i>Bacillus anthracis</i> | 0 | 0 | 0 |
| GCF_009806<br>655 | <i>Bacillus anthracis</i> | 0 | 0 | 0 |
| GCF_009806<br>675 | <i>Bacillus anthracis</i> | 0 | 0 | 0 |
| GCF_009806<br>695 | <i>Bacillus anthracis</i> | 0 | 0 | 0 |
| GCF_001936<br>375 | <i>Bacillus anthracis</i> | 1 | 0 | 0 |
| GCF_000534<br>935 | <i>Bacillus anthracis</i> | 2 | 0 | 0 |



|                   |                           |   |   |   |
|-------------------|---------------------------|---|---|---|
| GCF_001990<br>245 | <i>Bacillus anthracis</i> | 0 | 0 | 0 |
| GCF_012273<br>315 | <i>Bacillus anthracis</i> | 0 | 0 | 0 |
| GCF_000725<br>325 | <i>Bacillus anthracis</i> | 1 | 0 | 0 |
| GCF_012273<br>335 | <i>Bacillus anthracis</i> | 0 | 0 | 0 |
| GCF_012273<br>355 | <i>Bacillus anthracis</i> | 0 | 0 | 0 |
| GCF_000742<br>315 | <i>Bacillus anthracis</i> | 0 | 0 | 0 |
| GCF_012273<br>375 | <i>Bacillus anthracis</i> | 0 | 0 | 0 |
| GCF_000742<br>655 | <i>Bacillus anthracis</i> | 3 | 0 | 3 |
| GCF_000742<br>695 | <i>Bacillus anthracis</i> | 0 | 0 | 0 |
| GCF_000742<br>875 | <i>Bacillus anthracis</i> | 0 | 0 | 0 |
| GCF_000831<br>505 | <i>Bacillus anthracis</i> | 0 | 0 | 0 |
| GCF_000832<br>425 | <i>Bacillus anthracis</i> | 1 | 0 | 0 |
| GCF_000832<br>445 | <i>Bacillus anthracis</i> | 0 | 0 | 0 |
| GCF_000832<br>465 | <i>Bacillus anthracis</i> | 0 | 1 | 0 |
| GCF_004328<br>845 | <i>Bacillus anthracis</i> | 5 | 3 | 5 |
| GCF_000832<br>505 | <i>Bacillus anthracis</i> | 2 | 0 | 0 |
| GCF_002208<br>785 | <i>Bacillus anthracis</i> | 0 | 0 | 0 |
| GCF_000832<br>565 | <i>Bacillus anthracis</i> | 0 | 0 | 0 |
| GCF_000832<br>585 | <i>Bacillus anthracis</i> | 0 | 0 | 0 |
| GCF_013349<br>165 | <i>Bacillus anthracis</i> | 0 | 0 | 0 |
| GCF_000832<br>665 | <i>Bacillus anthracis</i> | 0 | 1 | 1 |
| GCF_013349<br>185 | <i>Bacillus anthracis</i> | 0 | 0 | 0 |

|                   |                                                |   |   |   |
|-------------------|------------------------------------------------|---|---|---|
| GCF_000832<br>725 | <i>Bacillus anthracis</i>                      | 0 | 0 | 0 |
| GCF_013349<br>245 | <i>Bacillus anthracis</i>                      | 0 | 0 | 0 |
| GCF_000832<br>745 | <i>Bacillus anthracis</i>                      | 0 | 0 | 0 |
| GCF_000832<br>965 | <i>Bacillus anthracis</i>                      | 0 | 0 | 0 |
| GCF_000833<br>065 | <i>Bacillus anthracis</i>                      | 0 | 0 | 0 |
| GCF_000833<br>125 | <i>Bacillus anthracis</i>                      | 0 | 1 | 0 |
| GCF_000559<br>005 | <i>Bacillus anthracis</i> 52-G                 | 1 | 2 | 0 |
| GCF_000558<br>965 | <i>Bacillus anthracis</i> 8903-G               | 1 | 0 | 0 |
| GCF_000558<br>985 | <i>Bacillus anthracis</i> 9080-G               | 2 | 0 | 0 |
| GCF_000022<br>865 | <i>Bacillus anthracis</i> str. A0248           | 0 | 0 | 0 |
| GCF_000512<br>835 | <i>Bacillus anthracis</i> str. A16             | 0 | 0 | 0 |
| GCF_000512<br>775 | <i>Bacillus anthracis</i> str. A16R            | 0 | 0 | 0 |
| GCF_000007<br>845 | <i>Bacillus anthracis</i> str. Ames            | 5 | 2 | 9 |
| GCF_000008<br>445 | <i>Bacillus anthracis</i> str. 'Ames Ancestor' | 0 | 0 | 0 |
| GCF_000295<br>695 | <i>Bacillus anthracis</i> str. BF1             | 2 | 1 | 1 |
| GCF_000021<br>445 | <i>Bacillus anthracis</i> str. CDC 684         | 1 | 0 | 0 |
| GCF_000258<br>885 | <i>Bacillus anthracis</i> str. H9401           | 1 | 0 | 0 |
| GCF_000008<br>165 | <i>Bacillus anthracis</i> str. Sterne          | 1 | 0 | 0 |
| GCF_000832<br>635 | <i>Bacillus anthracis</i> str. Sterne          | 0 | 0 | 0 |
| GCF_000583<br>105 | <i>Bacillus anthracis</i> str. SVA11           | 3 | 1 | 0 |
| GCF_000833<br>275 | <i>Bacillus anthracis</i> str. Turkey32        | 0 | 0 | 0 |
| GCF_000832<br>785 | <i>Bacillus anthracis</i> str. V770-NP-1R      | 0 | 0 | 0 |

|                   |                                             |    |    |    |
|-------------------|---------------------------------------------|----|----|----|
| GCF_000742<br>895 | <i>Bacillus anthracis str. Vollum</i>       | 0  | 0  | 0  |
| GCF_019693<br>235 | <i>Bacillus anthracis Strain: P04210076</i> | 1  | 1  | 0  |
| GCF_002688<br>645 | <i>Bacillus atrophaeus</i>                  | 10 | 6  | 9  |
| GCF_002173<br>495 | <i>Bacillus atrophaeus</i>                  | 17 | 9  | 9  |
| GCF_002243<br>495 | <i>Bacillus atrophaeus</i>                  | 17 | 9  | 11 |
| GCF_018140<br>555 | <i>Bacillus atrophaeus Strain: CNY01</i>    | 10 | 8  | 7  |
| GCF_019443<br>725 | <i>Bacillus atrophaeus Strain: PENSV20</i>  | 14 | 8  | 7  |
| GCF_000165<br>925 | <i>Bacillus atrophaeus 1942</i>             | 12 | 7  | 8  |
| GCF_000742<br>675 | <i>Bacillus atrophaeus subsp. globigii</i>  | 0  | 0  | 0  |
| GCF_000385<br>965 | <i>Bacillus atrophaeus UCMB-5137</i>        | 12 | 7  | 8  |
| GCF_001721<br>685 | <i>Bacillus beveridgei</i>                  | 1  | 0  | 2  |
| GCF_000831<br>065 | <i>Bacillus bombysepticus str. Wang</i>     | 11 | 10 | 5  |
| GCF_000835<br>185 | <i>Bacillus cereus</i>                      | 0  | 0  | 0  |
| GCF_006384<br>875 | <i>Bacillus cereus</i>                      | 4  | 7  | 5  |
| GCF_002290<br>105 | <i>Bacillus cereus</i>                      | 2  | 2  | 6  |
| GCF_000978<br>375 | <i>Bacillus cereus</i>                      | 4  | 5  | 6  |
| GCF_008041<br>975 | <i>Bacillus cereus</i>                      | 2  | 2  | 2  |
| GCF_001277<br>915 | <i>Bacillus cereus</i>                      | 6  | 3  | 7  |
| GCF_002813<br>875 | <i>Bacillus cereus</i>                      | 4  | 4  | 8  |
| GCF_001518<br>875 | <i>Bacillus cereus</i>                      | 4  | 3  | 3  |
| GCF_016027<br>015 | <i>Bacillus cereus</i>                      | 0  | 0  | 0  |
| GCF_003013<br>315 | <i>Bacillus cereus</i>                      | 7  | 5  | 6  |

|                   |                        |    |   |   |
|-------------------|------------------------|----|---|---|
| GCF_003020<br>845 | <i>Bacillus cereus</i> | 5  | 4 | 0 |
| GCF_009497<br>015 | <i>Bacillus cereus</i> | 13 | 6 | 5 |
| GCF_016727<br>405 | <i>Bacillus cereus</i> | 7  | 5 | 1 |
| GCF_016774<br>535 | <i>Bacillus cereus</i> | 0  | 0 | 0 |
| GCF_016774<br>555 | <i>Bacillus cereus</i> | 10 | 7 | 1 |
| GCF_016774<br>575 | <i>Bacillus cereus</i> | 0  | 0 | 0 |
| GCF_001635<br>915 | <i>Bacillus cereus</i> | 13 | 9 | 6 |
| GCF_001635<br>955 | <i>Bacillus cereus</i> | 0  | 1 | 0 |
| GCF_001635<br>995 | <i>Bacillus cereus</i> | 7  | 5 | 8 |
| GCF_016917<br>795 | <i>Bacillus cereus</i> | 5  | 5 | 3 |
| GCF_009739<br>925 | <i>Bacillus cereus</i> | 4  | 3 | 4 |
| GCF_009739<br>965 | <i>Bacillus cereus</i> | 0  | 0 | 0 |
| GCF_009739<br>985 | <i>Bacillus cereus</i> | 4  | 3 | 2 |
| GCF_001721<br>145 | <i>Bacillus cereus</i> | 5  | 5 | 1 |
| GCF_003568<br>565 | <i>Bacillus cereus</i> | 9  | 8 | 5 |
| GCF_001880<br>305 | <i>Bacillus cereus</i> | 5  | 3 | 7 |
| GCF_010223<br>795 | <i>Bacillus cereus</i> | 4  | 6 | 3 |
| GCF_010232<br>525 | <i>Bacillus cereus</i> | 0  | 0 | 0 |
| GCF_001941<br>885 | <i>Bacillus cereus</i> | 2  | 1 | 2 |
| GCF_001941<br>905 | <i>Bacillus cereus</i> | 0  | 0 | 0 |
| GCF_001941<br>925 | <i>Bacillus cereus</i> | 0  | 0 | 0 |
| GCF_000635<br>895 | <i>Bacillus cereus</i> | 10 | 7 | 7 |

|                   |                        |    |   |   |
|-------------------|------------------------|----|---|---|
| GCF_004006<br>495 | <i>Bacillus cereus</i> | 5  | 3 | 3 |
| GCF_002000<br>005 | <i>Bacillus cereus</i> | 5  | 3 | 3 |
| GCF_013112<br>375 | <i>Bacillus cereus</i> | 1  | 0 | 0 |
| GCF_002117<br>465 | <i>Bacillus cereus</i> | 1  | 0 | 1 |
| GCF_013177<br>495 | <i>Bacillus cereus</i> | 7  | 4 | 6 |
| GCF_000789<br>315 | <i>Bacillus cereus</i> | 4  | 1 | 9 |
| GCF_013267<br>235 | <i>Bacillus cereus</i> | 0  | 0 | 0 |
| GCF_013267<br>255 | <i>Bacillus cereus</i> | 10 | 8 | 7 |
| GCF_013267<br>275 | <i>Bacillus cereus</i> | 0  | 0 | 0 |
| GCF_013267<br>455 | <i>Bacillus cereus</i> | 0  | 0 | 0 |
| GCF_013267<br>475 | <i>Bacillus cereus</i> | 0  | 0 | 0 |
| GCF_013267<br>775 | <i>Bacillus cereus</i> | 0  | 2 | 0 |
| GCF_000832<br>525 | <i>Bacillus cereus</i> | 3  | 2 | 3 |
| GCF_002214<br>705 | <i>Bacillus cereus</i> | 8  | 8 | 1 |
| GCF_002214<br>725 | <i>Bacillus cereus</i> | 1  | 2 | 5 |
| GCF_002214<br>765 | <i>Bacillus cereus</i> | 4  | 3 | 1 |
| GCF_002215<br>175 | <i>Bacillus cereus</i> | 7  | 4 | 1 |
| GCF_002216<br>125 | <i>Bacillus cereus</i> | 0  | 1 | 0 |
| GCF_004771<br>155 | <i>Bacillus cereus</i> | 3  | 5 | 2 |
| GCF_000832<br>765 | <i>Bacillus cereus</i> | 0  | 0 | 0 |
| GCF_002220<br>285 | <i>Bacillus cereus</i> | 6  | 3 | 5 |
| GCF_004801<br>195 | <i>Bacillus cereus</i> | 3  | 0 | 4 |

|                   |                                             |    |   |    |
|-------------------|---------------------------------------------|----|---|----|
| GCF_013394<br>245 | <i>Bacillus cereus</i>                      | 2  | 1 | 0  |
| GCF_005707<br>595 | <i>Bacillus cereus</i>                      | 0  | 1 | 1  |
| GCF_018309<br>125 | <i>Bacillus cereus</i> Strain: BC06         | 1  | 2 | 6  |
| GCF_018309<br>165 | <i>Bacillus cereus</i> Strain: BC33         | 1  | 3 | 2  |
| GCF_018884<br>185 | <i>Bacillus cereus</i> Strain: CF4-51       | 5  | 5 | 6  |
| GCF_018309<br>145 | <i>Bacillus cereus</i> Strain: BC07         | 4  | 1 | 2  |
| GCF_016117<br>775 | <i>Bacillus cereus</i> Strain: FDAARGOS_919 | 0  | 0 | 0  |
| GCF_002952<br>815 | <i>Bacillus cereus</i> Strain: G9241        | 5  | 2 | 5  |
| GCF_000022<br>505 | <i>Bacillus cereus</i> 03BB102              | 2  | 0 | 7  |
| GCF_000832<br>405 | <i>Bacillus cereus</i> 03BB102              | 0  | 0 | 0  |
| GCF_000832<br>865 | <i>Bacillus cereus</i> 03BB108              | 1  | 0 | 5  |
| GCF_000160<br>935 | <i>Bacillus cereus</i> 172560W              | 11 | 8 | 7  |
| GCF_000161<br>135 | <i>Bacillus cereus</i> 95/8201              | 2  | 1 | 8  |
| GCF_000161<br>375 | <i>Bacillus cereus</i> AH1271               | 6  | 0 | 10 |
| GCF_000161<br>395 | <i>Bacillus cereus</i> AH1272               | 1  | 0 | 1  |
| GCF_000003<br>955 | <i>Bacillus cereus</i> AH1273               | 6  | 2 | 9  |
| GCF_000021<br>225 | <i>Bacillus cereus</i> AH187                | 5  | 2 | 7  |
| GCF_000161<br>355 | <i>Bacillus cereus</i> AH676                | 6  | 3 | 4  |
| GCF_000021<br>785 | <i>Bacillus cereus</i> AH820                | 4  | 2 | 5  |
| GCF_000160<br>895 | <i>Bacillus cereus</i> ATCC 10876           | 15 | 9 | 10 |
| GCF_000008<br>005 | <i>Bacillus cereus</i> ATCC 10987           | 4  | 2 | 7  |
| GCF_006094<br>295 | <i>Bacillus cereus</i> ATCC 14579           | 0  | 0 | 0  |

|                   |                                                 |   |   |    |
|-------------------|-------------------------------------------------|---|---|----|
| GCF_000007<br>825 | <i>Bacillus cereus</i> ATCC 14579               | 3 | 7 | 8  |
| GCF_002504<br>205 | <i>Bacillus cereus</i> ATCC 14579               | 4 | 4 | 2  |
| GCF_000161<br>015 | <i>Bacillus cereus</i> ATCC 4342                | 4 | 1 | 9  |
| GCF_000832<br>845 | <i>Bacillus cereus</i> ATCC 4342                | 0 | 0 | 0  |
| GCF_000021<br>205 | <i>Bacillus cereus</i> B4264                    | 6 | 3 | 7  |
| GCF_000161<br>115 | <i>Bacillus cereus</i> BDRD-Cer4                | 3 | 2 | 1  |
| GCF_000161<br>095 | <i>Bacillus cereus</i> BDRD-ST196               | 9 | 4 | 9  |
| GCF_000161<br>055 | <i>Bacillus cereus</i> BDRD-ST24                | 3 | 1 | 2  |
| GCF_000160<br>915 | <i>Bacillus cereus</i> BGSC 6E1                 | 6 | 6 | 3  |
| GCF_000143<br>605 | <i>Bacillus cereus</i> biovar anthracis str. CI | 7 | 2 | 4  |
| GCF_002224<br>345 | <i>Bacillus cereus</i> C1L                      | 6 | 7 | 6  |
| GCF_000832<br>385 | <i>Bacillus cereus</i> D17                      | 2 | 4 | 4  |
| GCF_000011<br>625 | <i>Bacillus cereus</i> E33L                     | 6 | 2 | 11 |
| GCF_000833<br>045 | <i>Bacillus cereus</i> E33L                     | 0 | 0 | 0  |
| GCF_000338<br>315 | <i>Bacillus cereus</i> F                        | 3 | 1 | 6  |
| GCF_000161<br>315 | <i>Bacillus cereus</i> F65185                   | 9 | 8 | 5  |
| GCF_000239<br>195 | <i>Bacillus cereus</i> F837/76                  | 1 | 1 | 3  |
| GCF_000292<br>415 | <i>Bacillus cereus</i> FRI-35                   | 3 | 3 | 4  |
| GCF_000832<br>805 | <i>Bacillus cereus</i> G9241                    | 0 | 0 | 0  |
| GCF_000021<br>305 | <i>Bacillus cereus</i> G9842                    | 8 | 4 | 9  |
| GCF_000003<br>645 | <i>Bacillus cereus</i> m1293                    | 4 | 3 | 7  |
| GCF_000161<br>035 | <i>Bacillus cereus</i> m1550                    | 5 | 4 | 4  |



|                   |                                           |    |   |   |
|-------------------|-------------------------------------------|----|---|---|
| GCF_000283<br>675 | <i>Bacillus cereus</i> NC7401             | 0  | 0 | 0 |
| GCF_000013<br>065 | <i>Bacillus cereus</i> Q1                 | 3  | 2 | 8 |
| GCF_000161<br>175 | <i>Bacillus cereus</i> Rock1-15           | 5  | 3 | 6 |
| GCF_000161<br>155 | <i>Bacillus cereus</i> Rock1-3            | 14 | 4 | 8 |
| GCF_000161<br>195 | <i>Bacillus cereus</i> Rock3-28           | 9  | 4 | 8 |
| GCF_000161<br>215 | <i>Bacillus cereus</i> Rock3-29           | 4  | 2 | 5 |
| GCF_000161<br>235 | <i>Bacillus cereus</i> Rock3-42           | 11 | 3 | 8 |
| GCF_000161<br>255 | <i>Bacillus cereus</i> Rock3-44           | 6  | 3 | 8 |
| GCF_000161<br>295 | <i>Bacillus cereus</i> Rock4-18           | 6  | 4 | 5 |
| GCF_000161<br>275 | <i>Bacillus cereus</i> Rock4-2            | 9  | 7 | 5 |
| GCF_007923<br>085 | <i>Bacillus cereus</i> Strain: Co1-1      | 1  | 0 | 1 |
| GCF_002251<br>005 | <i>Bacillus cytotoxicus</i>               | 1  | 0 | 0 |
| GCF_002251<br>025 | <i>Bacillus cytotoxicus</i>               | 0  | 0 | 0 |
| GCF_002251<br>045 | <i>Bacillus cytotoxicus</i>               | 0  | 0 | 0 |
| GCF_002251<br>055 | <i>Bacillus cytotoxicus</i>               | 0  | 0 | 0 |
| GCF_002251<br>115 | <i>Bacillus cytotoxicus</i>               | 0  | 0 | 0 |
| GCF_002250<br>885 | <i>Bacillus cytotoxicus</i>               | 5  | 7 | 2 |
| GCF_002250<br>905 | <i>Bacillus cytotoxicus</i>               | 3  | 3 | 2 |
| GCF_002250<br>925 | <i>Bacillus cytotoxicus</i>               | 1  | 0 | 2 |
| GCF_002250<br>945 | <i>Bacillus cytotoxicus</i>               | 0  | 1 | 0 |
| GCF_002250<br>965 | <i>Bacillus cytotoxicus</i>               | 0  | 1 | 0 |
| GCF_017909<br>295 | <i>Bacillus cytotoxicus</i> Strain: E28.3 | 0  | 1 | 0 |

|                   |                                             |    |    |    |
|-------------------|---------------------------------------------|----|----|----|
| GCF_017909<br>135 | <i>Bacillus cytotoxicus</i> Strain: SM1.1   | 0  | 0  | 0  |
| GCF_017909<br>395 | <i>Bacillus cytotoxicus</i> Strain: E17.4   | 0  | 0  | 0  |
| GCF_017909<br>435 | <i>Bacillus cytotoxicus</i> Strain: E8.1    | 0  | 1  | 0  |
| GCF_017909<br>235 | <i>Bacillus cytotoxicus</i> Strain: PDT2.12 | 0  | 2  | 0  |
| GCF_017909<br>015 | <i>Bacillus cytotoxicus</i> Strain: SM2.8   | 2  | 3  | 3  |
| GCF_000017<br>425 | <i>Bacillus cytotoxicus</i> NVH 391-98      | 5  | 5  | 6  |
| GCF_007995<br>155 | <i>Bacillus dafuensis</i>                   | 4  | 3  | 9  |
| GCF_900636<br>945 | <i>Bacillus freudenreichii</i>              | 3  | 0  | 5  |
| GCF_002443<br>095 | <i>Bacillus glycinifermentans</i>           | 9  | 6  | 7  |
| GCF_004103<br>615 | <i>Bacillus glycinifermentans</i>           | 8  | 2  | 7  |
| GCF_900093<br>775 | <i>Bacillus glycinifermentans</i>           | 0  | 0  | 0  |
| GCF_001278<br>705 | <i>Bacillus gobiensis</i>                   | 2  | 4  | 5  |
| GCF_018623<br>075 | <i>Bacillus haikouensis</i> Strain: MNJ12   | 3  | 0  | 6  |
| GCF_014621<br>755 | <i>Bacillus halotolerans</i>                | 9  | 3  | 5  |
| GCF_006965<br>425 | <i>Bacillus halotolerans</i>                | 9  | 4  | 7  |
| GCF_016093<br>395 | <i>Bacillus halotolerans</i>                | 12 | 5  | 7  |
| GCF_004006<br>435 | <i>Bacillus halotolerans</i>                | 11 | 5  | 8  |
| GCF_018417<br>515 | <i>Bacillus halotolerans</i> Strain: MBH1   | 11 | 4  | 8  |
| GCF_014042<br>035 | <i>Bacillus haynesii</i>                    | 13 | 3  | 7  |
| GCF_001534<br>785 | <i>Bacillus inaquosorum</i>                 | 16 | 10 | 10 |
| GCF_003148<br>415 | <i>Bacillus inaquosorum</i>                 | 14 | 11 | 9  |
| GCF_019598<br>985 | <i>Bacillus inaquosorum</i> Strain: CCSR02  | 7  | 5  | 2  |

|                   |                                       |   |   |    |
|-------------------|---------------------------------------|---|---|----|
| GCF_000473<br>245 | <i>Bacillus infantis</i> NRRL B-14911 | 1 | 0 | 11 |
| GCF_000959<br>025 | <i>Bacillus intestinalis</i>          | 1 | 0 | 2  |
| GCF_006094<br>335 | <i>Bacillus licheniformis</i>         | 0 | 1 | 0  |
| GCF_006494<br>795 | <i>Bacillus licheniformis</i>         | 1 | 1 | 0  |
| GCF_014673<br>515 | <i>Bacillus licheniformis</i>         | 0 | 0 | 0  |
| GCF_006974<br>025 | <i>Bacillus licheniformis</i>         | 3 | 0 | 1  |
| GCF_002504<br>325 | <i>Bacillus licheniformis</i>         | 1 | 2 | 2  |
| GCF_007855<br>455 | <i>Bacillus licheniformis</i>         | 0 | 0 | 1  |
| GCF_016026<br>835 | <i>Bacillus licheniformis</i>         | 1 | 1 | 1  |
| GCF_002966<br>955 | <i>Bacillus licheniformis</i>         | 1 | 1 | 1  |
| GCF_016126<br>875 | <i>Bacillus licheniformis</i>         | 0 | 0 | 0  |
| GCF_001596<br>055 | <i>Bacillus licheniformis</i>         | 3 | 1 | 3  |
| GCF_009662<br>395 | <i>Bacillus licheniformis</i>         | 0 | 0 | 0  |
| GCF_003253<br>815 | <i>Bacillus licheniformis</i>         | 1 | 1 | 0  |
| GCF_003339<br>545 | <i>Bacillus licheniformis</i>         | 0 | 0 | 0  |
| GCF_001726<br>125 | <i>Bacillus licheniformis</i>         | 3 | 2 | 1  |
| GCF_003595<br>625 | <i>Bacillus licheniformis</i>         | 2 | 1 | 1  |
| GCF_003606<br>405 | <i>Bacillus licheniformis</i>         | 1 | 2 | 0  |
| GCF_001914<br>255 | <i>Bacillus licheniformis</i>         | 2 | 1 | 1  |
| GCF_003952<br>865 | <i>Bacillus licheniformis</i>         | 0 | 0 | 0  |
| GCF_004101<br>525 | <i>Bacillus licheniformis</i>         | 1 | 0 | 0  |
| GCF_002074<br>075 | <i>Bacillus licheniformis</i>         | 2 | 1 | 3  |

|                   |                                                   |   |   |   |
|-------------------|---------------------------------------------------|---|---|---|
| GCF_002074<br>095 | <i>Bacillus licheniformis</i>                     | 1 | 1 | 0 |
| GCF_002074<br>115 | <i>Bacillus licheniformis</i>                     | 3 | 2 | 1 |
| GCF_002074<br>135 | <i>Bacillus licheniformis</i>                     | 2 | 0 | 0 |
| GCF_004103<br>575 | <i>Bacillus licheniformis</i>                     | 1 | 0 | 1 |
| GCF_002173<br>675 | <i>Bacillus licheniformis</i>                     | 2 | 0 | 0 |
| GCF_004119<br>755 | <i>Bacillus licheniformis</i>                     | 0 | 1 | 0 |
| GCF_002174<br>255 | <i>Bacillus licheniformis</i>                     | 0 | 0 | 0 |
| GCF_004119<br>795 | <i>Bacillus licheniformis</i>                     | 0 | 1 | 0 |
| GCF_004526<br>275 | <i>Bacillus licheniformis</i>                     | 2 | 1 | 0 |
| GCF_002236<br>895 | <i>Bacillus licheniformis</i>                     | 3 | 1 | 1 |
| GCF_902386<br>215 | <i>Bacillus licheniformis</i>                     | 0 | 0 | 0 |
| GCF_017338<br>795 | <i>Bacillus licheniformis</i> Strain: CP6         | 4 | 1 | 0 |
| GCF_015689<br>075 | <i>Bacillus licheniformis</i> Strain: LCDD6       | 2 | 1 | 0 |
| GCF_002953<br>475 | <i>Bacillus licheniformis</i> Strain: MBGJa67     | 2 | 1 | 1 |
| GCF_000008<br>425 | <i>Bacillus licheniformis</i> DSM 13 = ATCC 14580 | 6 | 2 | 7 |
| GCF_000011<br>645 | <i>Bacillus licheniformis</i> DSM 13 = ATCC 14580 | 0 | 0 | 0 |
| GCF_000258<br>125 | <i>Bacillus licheniformis</i> WX-02               | 4 | 2 | 2 |
| GCF_009739<br>945 | <i>Bacillus luti</i>                              | 7 | 2 | 7 |
| GCF_000724<br>485 | <i>Bacillus methanolicus</i> MGA3                 | 1 | 2 | 7 |
| GCF_003612<br>955 | <i>Bacillus mobilis</i>                           | 5 | 0 | 7 |
| GCF_015074<br>845 | <i>Bacillus mojavenis</i>                         | 9 | 6 | 9 |
| GCF_012648<br>005 | <i>Bacillus mojavenis</i>                         | 9 | 4 | 6 |

|                   |                                          |    |   |    |
|-------------------|------------------------------------------|----|---|----|
| GCF_008274<br>925 | <i>Bacillus mycoides</i>                 | 9  | 3 | 12 |
| GCF_000160<br>975 | <i>Bacillus mycoides</i>                 | 13 | 6 | 10 |
| GCF_000161<br>335 | <i>Bacillus mycoides</i>                 | 7  | 3 | 10 |
| GCF_002104<br>575 | <i>Bacillus mycoides</i>                 | 7  | 4 | 8  |
| GCF_000775<br>975 | <i>Bacillus mycoides</i>                 | 1  | 0 | 0  |
| GCF_000832<br>605 | <i>Bacillus mycoides</i>                 | 0  | 0 | 0  |
| GCF_018736<br>725 | <i>Bacillus mycoides</i> Strain: BPN07/3 | 3  | 2 | 10 |
| GCF_018736<br>765 | <i>Bacillus mycoides</i> Strain: BPN102  | 4  | 3 | 5  |
| GCF_018739<br>385 | <i>Bacillus mycoides</i> Strain: BPN29/1 | 7  | 1 | 7  |
| GCF_018742<br>205 | <i>Bacillus mycoides</i> Strain: BPN29/1 | 0  | 0 | 0  |
| GCF_018739<br>485 | <i>Bacillus mycoides</i> Strain: BPN36/3 | 3  | 3 | 0  |
| GCF_018739<br>525 | <i>Bacillus mycoides</i> Strain: BPN37/2 | 10 | 2 | 7  |
| GCF_018739<br>625 | <i>Bacillus mycoides</i> Strain: BPN51/1 | 6  | 1 | 5  |
| GCF_018739<br>645 | <i>Bacillus mycoides</i> Strain: BPN52/2 | 6  | 2 | 5  |
| GCF_018741<br>085 | <i>Bacillus mycoides</i> Strain: BPN601  | 0  | 0 | 0  |
| GCF_018741<br>145 | <i>Bacillus mycoides</i> Strain: JAS06/1 | 5  | 2 | 4  |
| GCF_018741<br>165 | <i>Bacillus mycoides</i> Strain: JAS06/3 | 6  | 4 | 6  |
| GCF_018742<br>045 | <i>Bacillus mycoides</i> Strain: JAS12/5 | 0  | 0 | 0  |
| GCF_018741<br>565 | <i>Bacillus mycoides</i> Strain: JAS23/1 | 5  | 1 | 6  |
| GCF_018741<br>605 | <i>Bacillus mycoides</i> Strain: JAS391  | 10 | 3 | 7  |
| GCF_018741<br>645 | <i>Bacillus mycoides</i> Strain: JAS481  | 9  | 2 | 2  |
| GCF_018736<br>705 | <i>Bacillus mycoides</i> Strain: BPN03/1 | 5  | 1 | 11 |

|                   |                                               |    |   |   |
|-------------------|-----------------------------------------------|----|---|---|
| GCF_018736<br>745 | <i>Bacillus mycoides</i> Strain: BPN09/1      | 7  | 1 | 4 |
| GCF_018739<br>305 | <i>Bacillus mycoides</i> Strain: BPN121       | 6  | 5 | 7 |
| GCF_018739<br>505 | <i>Bacillus mycoides</i> Strain: BPN37/1      | 5  | 1 | 6 |
| GCF_018739<br>545 | <i>Bacillus mycoides</i> Strain: BPN43/2      | 0  | 1 | 0 |
| GCF_018739<br>665 | <i>Bacillus mycoides</i> Strain: BPN54/2      | 1  | 0 | 3 |
| GCF_018740<br>945 | <i>Bacillus mycoides</i> Strain: BPN573       | 0  | 0 | 0 |
| GCF_018741<br>005 | <i>Bacillus mycoides</i> Strain: BPN58/4      | 5  | 1 | 5 |
| GCF_018739<br>705 | <i>Bacillus mycoides</i> Strain: JAS014       | 2  | 2 | 7 |
| GCF_018742<br>185 | <i>Bacillus mycoides</i> Strain: JAS06/1      | 0  | 0 | 0 |
| GCF_018741<br>465 | <i>Bacillus mycoides</i> Strain: JAS1004      | 10 | 1 | 6 |
| GCF_018741<br>505 | <i>Bacillus mycoides</i> Strain: JAS12/5      | 4  | 1 | 9 |
| GCF_018751<br>995 | <i>Bacillus mycoides</i> Strain: JAS15/1      | 4  | 1 | 0 |
| GCF_018742<br>225 | <i>Bacillus mycoides</i> Strain: JAS635       | 0  | 1 | 0 |
| GCF_018742<br>105 | <i>Bacillus mycoides</i> Strain: JAS85/1      | 3  | 1 | 1 |
| GCF_018742<br>265 | <i>Bacillus mycoides</i> Strain: JAS85/1      | 0  | 0 | 0 |
| GCF_018742<br>285 | <i>Bacillus mycoides</i> Strain: JAS94/5      | 5  | 1 | 0 |
| GCF_000003<br>925 | <i>Bacillus mycoides</i> DSM 2048             | 8  | 2 | 9 |
| GCF_000018<br>825 | <i>Bacillus mycoides</i> KBAB4                | 10 | 3 | 9 |
| GCF_018739<br>365 | <i>Bacillus mycoides</i> Strain: BPN211       | 5  | 4 | 5 |
| GCF_018739<br>445 | <i>Bacillus mycoides</i> Strain: BPN36/2      | 7  | 1 | 5 |
| GCF_018739<br>685 | <i>Bacillus mycoides</i> Strain: BPN57/2      | 5  | 4 | 7 |
| GCF_016117<br>755 | <i>Bacillus mycoides</i> Strain: FDAARGOS_924 | 0  | 0 | 0 |

|                   |                                                 |    |   |   |
|-------------------|-------------------------------------------------|----|---|---|
| GCF_018742<br>245 | <i>Bacillus mycoides</i> Strain: JAS823         | 1  | 1 | 3 |
| GCF_018141<br>025 | <i>Bacillus nitratireducens</i> Strain: BM02    | 3  | 3 | 9 |
| GCF_016925<br>055 | <i>Bacillus pacificus</i> Strain: Colony7       | 4  | 1 | 5 |
| GCF_016925<br>035 | <i>Bacillus pacificus</i> Strain: Colony 6      | 1  | 2 | 3 |
| GCF_016925<br>015 | <i>Bacillus pacificus</i> Strain: Colony501     | 2  | 2 | 6 |
| GCF_000876<br>525 | <i>Bacillus paralicheniformis</i>               | 10 | 3 | 6 |
| GCF_002393<br>225 | <i>Bacillus paralicheniformis</i>               | 10 | 5 | 6 |
| GCF_008365<br>255 | <i>Bacillus paralicheniformis</i>               | 5  | 0 | 1 |
| GCF_002993<br>925 | <i>Bacillus paralicheniformis</i>               | 10 | 3 | 6 |
| GCF_002993<br>945 | <i>Bacillus paralicheniformis</i>               | 15 | 6 | 5 |
| GCF_009497<br>935 | <i>Bacillus paralicheniformis</i>               | 1  | 1 | 0 |
| GCF_003711<br>025 | <i>Bacillus paralicheniformis</i>               | 3  | 1 | 0 |
| GCF_011068<br>305 | <i>Bacillus paralicheniformis</i>               | 11 | 2 | 7 |
| GCF_002068<br>155 | <i>Bacillus paralicheniformis</i>               | 11 | 2 | 2 |
| GCF_900635<br>765 | <i>Bacillus paralicheniformis</i>               | 8  | 1 | 1 |
| GCF_018324<br>565 | <i>Bacillus paralicheniformis</i> Strain: RSC-2 | 2  | 1 | 0 |
| GCF_000408<br>885 | <i>Bacillus paralicheniformis</i> ATCC 9945a    | 13 | 3 | 7 |
| GCF_018324<br>505 | <i>Bacillus paralicheniformis</i> Strain: RSC-1 | 9  | 2 | 2 |
| GCF_015334<br>865 | <i>Bacillus paranthracis</i>                    | 1  | 0 | 0 |
| GCF_015693<br>885 | <i>Bacillus paranthracis</i>                    | 2  | 2 | 2 |
| GCF_009648<br>955 | <i>Bacillus paranthracis</i>                    | 0  | 0 | 0 |
| GCF_016834<br>515 | <i>Bacillus paranthracis</i>                    | 0  | 0 | 0 |



|                   |                                                |    |    |    |
|-------------------|------------------------------------------------|----|----|----|
| GCF_009799<br>965 | <i>Bacillus paranthracis</i>                   | 1  | 0  | 2  |
| GCF_010669<br>045 | <i>Bacillus paranthracis</i>                   | 2  | 1  | 0  |
| GCF_005848<br>985 | <i>Bacillus paranthracis</i>                   | 4  | 4  | 8  |
| GCF_018513<br>785 | <i>Bacillus paranthracis</i> Strain: Colony502 | 2  | 2  | 3  |
| GCF_000161<br>415 | <i>Bacillus pseudomycooides</i>                | 16 | 7  | 10 |
| GCF_000161<br>435 | <i>Bacillus pseudomycooides</i>                | 20 | 6  | 8  |
| GCF_000742<br>855 | <i>Bacillus pseudomycooides</i>                | 5  | 4  | 8  |
| GCF_000832<br>885 | <i>Bacillus pseudomycooides</i>                | 1  | 1  | 0  |
| GCF_000161<br>455 | <i>Bacillus pseudomycooides</i> DSM 12442      | 19 | 14 | 13 |
| GCF_014489<br>355 | <i>Bacillus pumilus</i>                        | 10 | 8  | 5  |
| GCF_001548<br>215 | <i>Bacillus pumilus</i>                        | 4  | 4  | 4  |
| GCF_001578<br>165 | <i>Bacillus pumilus</i>                        | 8  | 7  | 8  |
| GCF_001578<br>205 | <i>Bacillus pumilus</i>                        | 9  | 8  | 6  |
| GCF_001687<br>085 | <i>Bacillus pumilus</i>                        | 2  | 4  | 5  |
| GCF_003431<br>975 | <i>Bacillus pumilus</i>                        | 9  | 9  | 8  |
| GCF_001704<br>975 | <i>Bacillus pumilus</i>                        | 9  | 7  | 7  |
| GCF_003571<br>425 | <i>Bacillus pumilus</i>                        | 8  | 6  | 5  |
| GCF_009937<br>765 | <i>Bacillus pumilus</i>                        | 10 | 12 | 2  |
| GCF_000590<br>455 | <i>Bacillus pumilus</i>                        | 4  | 4  | 8  |
| GCF_004006<br>455 | <i>Bacillus pumilus</i>                        | 7  | 7  | 4  |
| GCF_013423<br>765 | <i>Bacillus pumilus</i>                        | 9  | 8  | 6  |
| GCF_900186<br>955 | <i>Bacillus pumilus</i>                        | 10 | 7  | 6  |

|                   |                                       |    |    |    |
|-------------------|---------------------------------------|----|----|----|
| GCF_000017<br>885 | <i>Bacillus pumilus</i> SAFR-032      | 8  | 8  | 5  |
| GCF_008244<br>765 | <i>Bacillus safensis</i>              | 10 | 7  | 5  |
| GCF_016803<br>835 | <i>Bacillus safensis</i>              | 6  | 7  | 7  |
| GCF_001895<br>885 | <i>Bacillus safensis</i>              | 11 | 7  | 7  |
| GCF_001938<br>665 | <i>Bacillus safensis</i>              | 4  | 4  | 6  |
| GCF_001938<br>685 | <i>Bacillus safensis</i>              | 7  | 4  | 6  |
| GCF_001938<br>705 | <i>Bacillus safensis</i>              | 0  | 0  | 0  |
| GCF_002077<br>215 | <i>Bacillus safensis</i>              | 7  | 6  | 3  |
| GCF_003660<br>145 | <i>Bacillus safensis</i> Strain: sami | 11 | 7  | 7  |
| GCF_003097<br>715 | <i>Bacillus safensis</i> FO-36b       | 6  | 5  | 5  |
| GCF_002850<br>535 | <i>Bacillus siamensis</i>             | 1  | 1  | 2  |
| GCF_016313<br>165 | <i>Bacillus siamensis</i>             | 11 | 9  | 10 |
| GCF_001050<br>115 | <i>Bacillus smithii</i>               | 3  | 1  | 6  |
| GCF_002202<br>015 | <i>Bacillus sonorensis</i>            | 12 | 6  | 7  |
| GCF_000242<br>895 | <i>Bacillus</i> sp. 1NLA3E            | 3  | 0  | 8  |
| GCF_002269<br>275 | <i>Bacillus</i> sp. 1s-1              | 0  | 0  | 0  |
| GCF_001999<br>205 | <i>Bacillus</i> sp. 275               | 11 | 10 | 6  |
| GCF_017161<br>885 | <i>Bacillus</i> sp. 3a                | 9  | 8  | 4  |
| GCF_019464<br>555 | <i>Bacillus</i> sp. 7D3               | 3  | 1  | 1  |
| GCF_009861<br>435 | <i>Bacillus</i> sp. A260              | 1  | 1  | 1  |
| GCF_001831<br>375 | <i>Bacillus</i> sp. ABP14             | 4  | 1  | 6  |
| GCF_009906<br>915 | <i>Bacillus</i> sp. AM1(2019)         | 13 | 13 | 8  |

|                   |                                  |    |   |   |
|-------------------|----------------------------------|----|---|---|
| GCF_008274<br>865 | <i>Bacillus sp. AR4-2</i>        | 7  | 3 | 0 |
| GCF_001679<br>765 | <i>Bacillus sp. B25</i>          | 5  | 3 | 5 |
| GCF_007363<br>175 | <i>Bacillus sp. BD59S</i>        | 6  | 2 | 7 |
| GCF_000827<br>045 | <i>Bacillus sp. BH072</i>        | 3  | 3 | 0 |
| GCF_008432<br>245 | <i>Bacillus sp. BS98</i>         | 5  | 3 | 1 |
| GCF_003355<br>115 | <i>Bacillus sp. COPE52</i>       | 10 | 6 | 7 |
| GCF_003429<br>245 | <i>Bacillus sp. CR71</i>         | 2  | 0 | 0 |
| GCF_012955<br>605 | <i>Bacillus sp. CS13</i>         | 1  | 1 | 6 |
| GCF_011082<br>085 | <i>Bacillus sp. Cs-700</i>       | 2  | 0 | 9 |
| GCF_003330<br>965 | <i>Bacillus sp. DM2</i>          | 5  | 1 | 1 |
| GCF_009720<br>625 | <i>Bacillus sp. DSL-17</i>       | 4  | 0 | 7 |
| GCF_004799<br>705 | <i>Bacillus sp. DU-106</i>       | 3  | 0 | 4 |
| GCF_003429<br>225 | <i>Bacillus sp. E25</i>          | 10 | 7 | 4 |
| GCF_002073<br>415 | <i>Bacillus sp. FDAARGOS_235</i> | 4  | 1 | 0 |
| GCF_003812<br>125 | <i>Bacillus sp. FDAARGOS_527</i> | 1  | 0 | 1 |
| GCF_001719<br>225 | <i>Bacillus sp. FJAT-14266</i>   | 9  | 3 | 5 |
| GCF_001278<br>805 | <i>Bacillus sp. FJAT-18017</i>   | 1  | 0 | 7 |
| GCF_001278<br>755 | <i>Bacillus sp. FJAT-22090</i>   | 3  | 2 | 6 |
| GCF_003816<br>055 | <i>Bacillus sp. FJAT-42376</i>   | 3  | 0 | 7 |
| GCF_002813<br>025 | <i>Bacillus sp. FJAT-45348</i>   | 1  | 1 | 7 |
| GCF_001896<br>025 | <i>Bacillus sp. H15-1</i>        | 1  | 2 | 1 |
| GCF_002833<br>485 | <i>Bacillus sp. HBCD-sjtu</i>    | 4  | 1 | 4 |

|                   |                                |    |    |    |
|-------------------|--------------------------------|----|----|----|
| GCF_014960<br>805 | <i>Bacillus sp. HD4P25</i>     | 4  | 1  | 5  |
| GCF_012572<br>025 | <i>Bacillus sp. HNA3</i>       | 1  | 1  | 1  |
| GCF_001648<br>135 | <i>Bacillus sp. IHB B 7164</i> | 2  | 4  | 5  |
| GCF_008274<br>905 | <i>Bacillus sp. JAS24-2</i>    | 9  | 5  | 5  |
| GCF_018861<br>275 | <i>Bacillus sp. JNUCC-22</i>   | 9  | 12 | 10 |
| GCF_018885<br>385 | <i>Bacillus sp. JNUCC-24</i>   | 7  | 6  | 4  |
| GCF_000259<br>365 | <i>Bacillus sp. JS</i>         | 12 | 7  | 12 |
| GCF_005937<br>795 | <i>Bacillus sp. KBS0812</i>    | 0  | 0  | 0  |
| GCF_011398<br>925 | <i>Bacillus sp. KH172YL63</i>  | 2  | 1  | 8  |
| GCF_016924<br>995 | <i>Bacillus sp. LJBS06</i>     | 11 | 8  | 8  |
| GCF_019334<br>685 | <i>Bacillus sp. LJBS17</i>     | 5  | 3  | 3  |
| GCF_017797<br>845 | <i>Bacillus sp. LJBV19</i>     | 12 | 13 | 10 |
| GCF_000978<br>495 | <i>Bacillus sp. LM 4-2</i>     | 8  | 4  | 5  |
| GCF_011008<br>975 | <i>Bacillus sp. LUNF1</i>      | 0  | 0  | 0  |
| GCF_002763<br>675 | <i>Bacillus sp. Lzh-5</i>      | 2  | 1  | 0  |
| GCF_006965<br>545 | <i>Bacillus sp. M4U3P1</i>     | 1  | 0  | 3  |
| GCF_002953<br>915 | <i>Bacillus sp. MBGLi79</i>    | 16 | 6  | 15 |
| GCF_002201<br>875 | <i>Bacillus sp. MD-5</i>       | 11 | 7  | 10 |
| GCF_009759<br>805 | <i>Bacillus sp. ms-22</i>      | 4  | 4  | 6  |
| GCF_009818<br>105 | <i>Bacillus sp. N1-1</i>       | 3  | 0  | 9  |
| GCF_009676<br>825 | <i>Bacillus sp. N3536</i>      | 3  | 1  | 7  |
| GCF_018889<br>975 | <i>Bacillus sp. NP157</i>      | 3  | 3  | 1  |

|            |                               |    |    |    |
|------------|-------------------------------|----|----|----|
| GCF_000465 | <i>Bacillus sp. NSP9.1</i>    | 6  | 2  | 8  |
| 465        |                               |    |    |    |
| GCF_000829 | <i>Bacillus sp. OxB-1</i>     | 4  | 2  | 11 |
| 195        |                               |    |    |    |
| GCF_014302 | <i>Bacillus sp. PAMC22265</i> | 0  | 0  | 0  |
| 175        |                               |    |    |    |
| GCF_014250 | <i>Bacillus sp. PAMC26543</i> | 10 | 7  | 5  |
| 375        |                               |    |    |    |
| GCF_014235 | <i>Bacillus sp. PAMC26568</i> | 4  | 0  | 7  |
| 785        |                               |    |    |    |
| GCF_014250 | <i>Bacillus sp. PAMC28571</i> | 9  | 7  | 5  |
| 435        |                               |    |    |    |
| GCF_014250 | <i>Bacillus sp. PAMC28748</i> | 1  | 0  | 0  |
| 415        |                               |    |    |    |
| GCF_000815 | <i>Bacillus sp. Pc3</i>       | 13 | 14 | 12 |
| 145        |                               |    |    |    |
| GCF_016919 | <i>Bacillus sp. PDNC022</i>   | 7  | 4  | 5  |
| 285        |                               |    |    |    |
| GCF_001816 | <i>Bacillus sp. RZ2MS9</i>    | 6  | 3  | 4  |
| 185        |                               |    |    |    |
| GCF_005154 | <i>Bacillus sp. S3</i>        | 3  | 0  | 10 |
| 805        |                               |    |    |    |
| GCF_000469 | <i>Bacillus sp. SB49</i>      | 2  | 1  | 7  |
| 135        |                               |    |    |    |
| GCF_001553 | <i>Bacillus sp. SDLI1</i>     | 12 | 13 | 13 |
| 895        |                               |    |    |    |
| GCF_008274 | <i>Bacillus sp. SH8-8</i>     | 0  | 0  | 0  |
| 885        |                               |    |    |    |
| GCF_002843 | <i>Bacillus sp. SJ-10</i>     | 7  | 5  | 5  |
| 505        |                               |    |    |    |
| GCF_003171 | <i>Bacillus sp. SUBG0010</i>  | 11 | 2  | 5  |
| 815        |                               |    |    |    |
| GCF_004322 | <i>Bacillus sp. SYJ</i>       | 4  | 1  | 10 |
| 655        |                               |    |    |    |
| GCF_009363 | <i>Bacillus sp. THAF10</i>    | 3  | 1  | 5  |
| 695        |                               |    |    |    |
| GCF_016653 | <i>Bacillus sp. TK-2</i>      | 6  | 4  | 6  |
| 575        |                               |    |    |    |
| GCF_015999 | <i>Bacillus sp. V3</i>        | 4  | 0  | 7  |
| 585        |                               |    |    |    |
| GCF_000800 | <i>Bacillus sp. WP8</i>       | 8  | 4  | 5  |
| 825        |                               |    |    |    |
| GCF_004103 | <i>Bacillus sp. WR11</i>      | 0  | 0  | 0  |
| 875        |                               |    |    |    |

|                   |                              |    |    |   |
|-------------------|------------------------------|----|----|---|
| GCF_000747<br>345 | <i>Bacillus sp. X1(2014)</i> | 4  | 0  | 7 |
| GCF_003047<br>225 | <i>Bacillus sp. Y-01</i>     | 2  | 4  | 3 |
| GCF_003586<br>445 | <i>Bacillus sp. Y1</i>       | 3  | 0  | 5 |
| GCF_000877<br>815 | <i>Bacillus sp. YP1</i>      | 9  | 5  | 6 |
| GCF_003047<br>165 | <i>Bacillus sp. ZY-1-1</i>   | 7  | 14 | 8 |
| GCF_002269<br>175 | <i>Bacillus subtilis</i>     | 3  | 3  | 2 |
| GCF_002269<br>195 | <i>Bacillus subtilis</i>     | 0  | 0  | 1 |
| GCF_006165<br>085 | <i>Bacillus subtilis</i>     | 2  | 3  | 2 |
| GCF_006364<br>495 | <i>Bacillus subtilis</i>     | 0  | 0  | 0 |
| GCF_000952<br>895 | <i>Bacillus subtilis</i>     | 0  | 0  | 0 |
| GCF_000953<br>615 | <i>Bacillus subtilis</i>     | 0  | 0  | 0 |
| GCF_002290<br>305 | <i>Bacillus subtilis</i>     | 14 | 11 | 4 |
| GCF_014879<br>275 | <i>Bacillus subtilis</i>     | 7  | 5  | 8 |
| GCF_001015<br>095 | <i>Bacillus subtilis</i>     | 9  | 4  | 8 |
| GCF_001037<br>985 | <i>Bacillus subtilis</i>     | 0  | 0  | 0 |
| GCF_015535<br>655 | <i>Bacillus subtilis</i>     | 0  | 2  | 1 |
| GCF_015602<br>625 | <i>Bacillus subtilis</i>     | 5  | 4  | 2 |
| GCF_015654<br>205 | <i>Bacillus subtilis</i>     | 1  | 0  | 0 |
| GCF_002893<br>805 | <i>Bacillus subtilis</i>     | 7  | 5  | 5 |
| GCF_008831<br>405 | <i>Bacillus subtilis</i>     | 1  | 1  | 0 |
| GCF_016065<br>415 | <i>Bacillus subtilis</i>     | 0  | 0  | 0 |
| GCF_009017<br>455 | <i>Bacillus subtilis</i>     | 9  | 6  | 7 |

|                   |                          |    |   |   |
|-------------------|--------------------------|----|---|---|
| GCF_002982<br>175 | <i>Bacillus subtilis</i> | 0  | 0 | 0 |
| GCF_009363<br>835 | <i>Bacillus subtilis</i> | 5  | 1 | 4 |
| GCF_009497<br>795 | <i>Bacillus subtilis</i> | 10 | 4 | 7 |
| GCF_009497<br>815 | <i>Bacillus subtilis</i> | 8  | 4 | 8 |
| GCF_009662<br>155 | <i>Bacillus subtilis</i> | 4  | 2 | 1 |
| GCF_009662<br>175 | <i>Bacillus subtilis</i> | 1  | 2 | 0 |
| GCF_009662<br>195 | <i>Bacillus subtilis</i> | 4  | 2 | 2 |
| GCF_009662<br>215 | <i>Bacillus subtilis</i> | 1  | 0 | 2 |
| GCF_009662<br>235 | <i>Bacillus subtilis</i> | 5  | 2 | 2 |
| GCF_001604<br>995 | <i>Bacillus subtilis</i> | 0  | 0 | 1 |
| GCF_009662<br>255 | <i>Bacillus subtilis</i> | 1  | 0 | 1 |
| GCF_009662<br>275 | <i>Bacillus subtilis</i> | 1  | 0 | 0 |
| GCF_009662<br>335 | <i>Bacillus subtilis</i> | 3  | 2 | 3 |
| GCF_003148<br>355 | <i>Bacillus subtilis</i> | 8  | 3 | 6 |
| GCF_009662<br>355 | <i>Bacillus subtilis</i> | 4  | 2 | 1 |
| GCF_009662<br>375 | <i>Bacillus subtilis</i> | 2  | 1 | 1 |
| GCF_009662<br>415 | <i>Bacillus subtilis</i> | 0  | 0 | 0 |
| GCF_009662<br>435 | <i>Bacillus subtilis</i> | 0  | 0 | 0 |
| GCF_009662<br>455 | <i>Bacillus subtilis</i> | 0  | 0 | 0 |
| GCF_016894<br>165 | <i>Bacillus subtilis</i> | 8  | 5 | 5 |
| GCF_003184<br>225 | <i>Bacillus subtilis</i> | 5  | 4 | 4 |
| GCF_009665<br>145 | <i>Bacillus subtilis</i> | 0  | 0 | 0 |



|                   |                          |    |    |    |
|-------------------|--------------------------|----|----|----|
| GCF_009676<br>665 | <i>Bacillus subtilis</i> | 3  | 5  | 0  |
| GCF_001704<br>095 | <i>Bacillus subtilis</i> | 4  | 2  | 1  |
| GCF_001720<br>505 | <i>Bacillus subtilis</i> | 8  | 5  | 5  |
| GCF_009857<br>115 | <i>Bacillus subtilis</i> | 1  | 1  | 0  |
| GCF_009866<br>865 | <i>Bacillus subtilis</i> | 7  | 2  | 2  |
| GCF_009884<br>005 | <i>Bacillus subtilis</i> | 3  | 1  | 0  |
| GCF_001746<br>575 | <i>Bacillus subtilis</i> | 5  | 3  | 2  |
| GCF_009913<br>255 | <i>Bacillus subtilis</i> | 10 | 5  | 4  |
| GCF_001747<br>445 | <i>Bacillus subtilis</i> | 5  | 3  | 4  |
| GCF_009913<br>275 | <i>Bacillus subtilis</i> | 9  | 5  | 7  |
| GCF_003610<br>955 | <i>Bacillus subtilis</i> | 0  | 0  | 1  |
| GCF_001808<br>235 | <i>Bacillus subtilis</i> | 10 | 4  | 8  |
| GCF_009913<br>395 | <i>Bacillus subtilis</i> | 4  | 2  | 1  |
| GCF_009913<br>515 | <i>Bacillus subtilis</i> | 4  | 4  | 4  |
| GCF_009913<br>535 | <i>Bacillus subtilis</i> | 0  | 0  | 0  |
| GCF_009913<br>555 | <i>Bacillus subtilis</i> | 3  | 0  | 2  |
| GCF_009913<br>575 | <i>Bacillus subtilis</i> | 9  | 5  | 6  |
| GCF_009913<br>595 | <i>Bacillus subtilis</i> | 9  | 6  | 7  |
| GCF_001889<br>385 | <i>Bacillus subtilis</i> | 10 | 13 | 10 |
| GCF_001889<br>625 | <i>Bacillus subtilis</i> | 8  | 5  | 6  |
| GCF_009914<br>155 | <i>Bacillus subtilis</i> | 3  | 2  | 2  |
| GCF_001890<br>405 | <i>Bacillus subtilis</i> | 0  | 0  | 0  |

|                   |                          |    |    |    |
|-------------------|--------------------------|----|----|----|
| GCF_009937<br>745 | <i>Bacillus subtilis</i> | 21 | 8  | 7  |
| GCF_001902<br>555 | <i>Bacillus subtilis</i> | 0  | 0  | 0  |
| GCF_011765<br>645 | <i>Bacillus subtilis</i> | 6  | 3  | 2  |
| GCF_004101<br>345 | <i>Bacillus subtilis</i> | 6  | 3  | 1  |
| GCF_004101<br>365 | <i>Bacillus subtilis</i> | 1  | 0  | 0  |
| GCF_004101<br>405 | <i>Bacillus subtilis</i> | 0  | 0  | 0  |
| GCF_004101<br>425 | <i>Bacillus subtilis</i> | 3  | 2  | 2  |
| GCF_004101<br>445 | <i>Bacillus subtilis</i> | 3  | 0  | 0  |
| GCF_002055<br>965 | <i>Bacillus subtilis</i> | 0  | 0  | 0  |
| GCF_004101<br>465 | <i>Bacillus subtilis</i> | 1  | 0  | 1  |
| GCF_004101<br>485 | <i>Bacillus subtilis</i> | 4  | 3  | 4  |
| GCF_004101<br>565 | <i>Bacillus subtilis</i> | 0  | 0  | 0  |
| GCF_002072<br>735 | <i>Bacillus subtilis</i> | 10 | 5  | 5  |
| GCF_004101<br>945 | <i>Bacillus subtilis</i> | 6  | 1  | 5  |
| GCF_004103<br>535 | <i>Bacillus subtilis</i> | 11 | 4  | 4  |
| GCF_012647<br>565 | <i>Bacillus subtilis</i> | 14 | 8  | 7  |
| GCF_004103<br>555 | <i>Bacillus subtilis</i> | 1  | 1  | 1  |
| GCF_004103<br>595 | <i>Bacillus subtilis</i> | 10 | 5  | 6  |
| GCF_002096<br>095 | <i>Bacillus subtilis</i> | 2  | 0  | 0  |
| GCF_000769<br>515 | <i>Bacillus subtilis</i> | 17 | 23 | 11 |
| GCF_004119<br>535 | <i>Bacillus subtilis</i> | 11 | 5  | 6  |
| GCF_000772<br>125 | <i>Bacillus subtilis</i> | 1  | 1  | 0  |

|                   |                          |    |    |    |
|-------------------|--------------------------|----|----|----|
| GCF_004119<br>555 | <i>Bacillus subtilis</i> | 1  | 1  | 1  |
| GCF_000772<br>165 | <i>Bacillus subtilis</i> | 9  | 11 | 7  |
| GCF_000772<br>205 | <i>Bacillus subtilis</i> | 5  | 6  | 1  |
| GCF_004119<br>595 | <i>Bacillus subtilis</i> | 0  | 0  | 0  |
| GCF_002142<br>595 | <i>Bacillus subtilis</i> | 10 | 5  | 6  |
| GCF_004119<br>615 | <i>Bacillus subtilis</i> | 3  | 1  | 5  |
| GCF_000782<br>835 | <i>Bacillus subtilis</i> | 11 | 5  | 7  |
| GCF_002163<br>815 | <i>Bacillus subtilis</i> | 14 | 9  | 10 |
| GCF_004119<br>635 | <i>Bacillus subtilis</i> | 4  | 2  | 2  |
| GCF_004119<br>655 | <i>Bacillus subtilis</i> | 10 | 4  | 1  |
| GCF_000789<br>295 | <i>Bacillus subtilis</i> | 0  | 0  | 0  |
| GCF_004119<br>675 | <i>Bacillus subtilis</i> | 3  | 1  | 1  |
| GCF_004119<br>695 | <i>Bacillus subtilis</i> | 10 | 4  | 7  |
| GCF_004119<br>715 | <i>Bacillus subtilis</i> | 1  | 0  | 0  |
| GCF_004119<br>775 | <i>Bacillus subtilis</i> | 6  | 3  | 4  |
| GCF_004119<br>815 | <i>Bacillus subtilis</i> | 9  | 5  | 4  |
| GCF_004119<br>835 | <i>Bacillus subtilis</i> | 6  | 1  | 2  |
| GCF_004119<br>875 | <i>Bacillus subtilis</i> | 1  | 0  | 0  |
| GCF_013285<br>325 | <i>Bacillus subtilis</i> | 10 | 5  | 6  |
| GCF_002202<br>055 | <i>Bacillus subtilis</i> | 4  | 1  | 0  |
| GCF_002205<br>435 | <i>Bacillus subtilis</i> | 9  | 3  | 8  |
| GCF_013347<br>105 | <i>Bacillus subtilis</i> | 11 | 2  | 5  |

|                   |                                                        |    |   |   |
|-------------------|--------------------------------------------------------|----|---|---|
| GCF_002216<br>085 | <i>Bacillus subtilis</i>                               | 0  | 0 | 0 |
| GCF_013388<br>335 | <i>Bacillus subtilis</i>                               | 0  | 0 | 0 |
| GCF_002220<br>075 | <i>Bacillus subtilis</i>                               | 6  | 4 | 3 |
| GCF_013393<br>725 | <i>Bacillus subtilis</i>                               | 5  | 5 | 2 |
| GCF_005153<br>965 | <i>Bacillus subtilis</i>                               | 0  | 0 | 0 |
| GCF_005160<br>425 | <i>Bacillus subtilis</i>                               | 2  | 0 | 0 |
| GCF_005234<br>095 | <i>Bacillus subtilis</i>                               | 7  | 2 | 6 |
| GCF_005849<br>145 | <i>Bacillus subtilis</i>                               | 0  | 0 | 2 |
| GCF_014171<br>535 | <i>Bacillus subtilis</i>                               | 8  | 4 | 3 |
| GCF_018394<br>175 | <i>Bacillus subtilis</i> Strain: <i>BYS2</i>           | 0  | 0 | 2 |
| GCF_018141<br>065 | <i>Bacillus subtilis</i> Strain: <i>PMB102</i>         | 7  | 5 | 7 |
| GCF_018224<br>865 | <i>Bacillus subtilis</i> Strain: <i>SC3.7</i>          | 10 | 8 | 7 |
| GCF_003515<br>125 | <i>Bacillus subtilis</i> Strain: <i>FB6-3</i>          | 6  | 2 | 5 |
| GCF_019464<br>335 | <i>Bacillus subtilis</i> Strain: <i>HD15</i>           | 7  | 2 | 2 |
| GCF_018884<br>165 | <i>Bacillus subtilis</i> Strain: <i>s-16</i>           | 4  | 1 | 2 |
| GCF_017753<br>785 | <i>Bacillus subtilis</i> Strain: <i>YB-04</i>          | 0  | 1 | 0 |
| GCF_000523<br>045 | <i>Bacillus subtilis</i> <i>BEST7003</i>               | 2  | 1 | 0 |
| GCF_000186<br>745 | <i>Bacillus subtilis</i> <i>BSn5</i>                   | 10 | 7 | 8 |
| GCF_000973<br>605 | <i>Bacillus subtilis</i> <i>HJ5</i>                    | 4  | 2 | 2 |
| GCF_000971<br>925 | <i>Bacillus subtilis</i> <i>KCTC 1028 = ATCC 6051a</i> | 0  | 0 | 0 |
| GCF_000497<br>485 | <i>Bacillus subtilis</i> <i>PY79</i>                   | 1  | 0 | 0 |
| GCF_000293<br>765 | <i>Bacillus subtilis</i> <i>QB928</i>                  | 2  | 1 | 0 |

|                   |                                                             |    |   |   |
|-------------------|-------------------------------------------------------------|----|---|---|
| GCF_019599<br>105 | <i>Bacillus subtilis</i> Strain: YPS-32                     | 0  | 0 | 0 |
| GCF_001597<br>265 | <i>Bacillus subtilis</i> subsp. <i>globigii</i>             | 1  | 1 | 0 |
| GCF_001565<br>875 | <i>Bacillus subtilis</i> subsp. <i>natto</i>                | 1  | 1 | 0 |
| GCF_000209<br>795 | <i>Bacillus subtilis</i> subsp. <i>natto</i> BEST195        | 6  | 3 | 6 |
| GCF_006094<br>475 | <i>Bacillus subtilis</i> subsp. <i>spizizenii</i> ATCC 6633 | 0  | 0 | 0 |
| GCF_000146<br>565 | <i>Bacillus subtilis</i> subsp. <i>spizizenii</i> str. W23  | 8  | 6 | 8 |
| GCF_000227<br>465 | <i>Bacillus subtilis</i> subsp. <i>spizizenii</i> TU-B-10   | 7  | 6 | 9 |
| GCF_014298<br>115 | <i>Bacillus subtilis</i> subsp. <i>subtilis</i>             | 10 | 5 | 7 |
| GCF_006741<br>845 | <i>Bacillus subtilis</i> subsp. <i>subtilis</i>             | 0  | 1 | 0 |
| GCF_014961<br>985 | <i>Bacillus subtilis</i> subsp. <i>subtilis</i>             | 1  | 2 | 2 |
| GCF_001465<br>815 | <i>Bacillus subtilis</i> subsp. <i>subtilis</i>             | 2  | 1 | 0 |
| GCF_001541<br>905 | <i>Bacillus subtilis</i> subsp. <i>subtilis</i>             | 0  | 0 | 0 |
| GCF_001660<br>525 | <i>Bacillus subtilis</i> subsp. <i>subtilis</i>             | 0  | 0 | 0 |
| GCF_003426<br>125 | <i>Bacillus subtilis</i> subsp. <i>subtilis</i>             | 10 | 6 | 8 |
| GCF_001697<br>265 | <i>Bacillus subtilis</i> subsp. <i>subtilis</i>             | 0  | 1 | 2 |
| GCF_001703<br>495 | <i>Bacillus subtilis</i> subsp. <i>subtilis</i>             | 0  | 0 | 0 |
| GCF_001750<br>745 | <i>Bacillus subtilis</i> subsp. <i>subtilis</i>             | 0  | 1 | 0 |
| GCF_001750<br>765 | <i>Bacillus subtilis</i> subsp. <i>subtilis</i>             | 0  | 2 | 0 |
| GCF_003665<br>195 | <i>Bacillus subtilis</i> subsp. <i>subtilis</i>             | 0  | 0 | 0 |
| GCF_003665<br>215 | <i>Bacillus subtilis</i> subsp. <i>subtilis</i>             | 5  | 4 | 7 |
| GCF_003665<br>235 | <i>Bacillus subtilis</i> subsp. <i>subtilis</i>             | 3  | 2 | 2 |
| GCF_003665<br>255 | <i>Bacillus subtilis</i> subsp. <i>subtilis</i>             | 6  | 0 | 3 |

|                   |                                                                   |    |   |   |
|-------------------|-------------------------------------------------------------------|----|---|---|
| GCF_003665<br>275 | <i>Bacillus subtilis subsp. subtilis</i>                          | 2  | 0 | 0 |
| GCF_003665<br>295 | <i>Bacillus subtilis subsp. subtilis</i>                          | 0  | 0 | 0 |
| GCF_003665<br>315 | <i>Bacillus subtilis subsp. subtilis</i>                          | 0  | 1 | 0 |
| GCF_003665<br>335 | <i>Bacillus subtilis subsp. subtilis</i>                          | 0  | 0 | 0 |
| GCF_003665<br>355 | <i>Bacillus subtilis subsp. subtilis</i>                          | 0  | 0 | 0 |
| GCF_003665<br>395 | <i>Bacillus subtilis subsp. subtilis</i>                          | 0  | 0 | 0 |
| GCF_012648<br>205 | <i>Bacillus subtilis subsp. subtilis</i>                          | 2  | 1 | 1 |
| GCF_012648<br>345 | <i>Bacillus subtilis subsp. subtilis</i>                          | 0  | 0 | 0 |
| GCF_002173<br>615 | <i>Bacillus subtilis subsp. subtilis</i>                          | 1  | 0 | 0 |
| GCF_002173<br>695 | <i>Bacillus subtilis subsp. subtilis</i>                          | 4  | 2 | 3 |
| GCF_002173<br>715 | <i>Bacillus subtilis subsp. subtilis</i>                          | 0  | 0 | 0 |
| GCF_000827<br>065 | <i>Bacillus subtilis subsp. subtilis</i>                          | 0  | 0 | 0 |
| GCF_002201<br>955 | <i>Bacillus subtilis subsp. subtilis</i>                          | 0  | 0 | 0 |
| GCF_002201<br>995 | <i>Bacillus subtilis subsp. subtilis</i>                          | 3  | 0 | 3 |
| GCF_002202<br>035 | <i>Bacillus subtilis subsp. subtilis</i>                          | 12 | 6 | 4 |
| GCF_004328<br>925 | <i>Bacillus subtilis subsp. subtilis</i>                          | 12 | 3 | 5 |
| GCF_018454<br>405 | <i>Bacillus subtilis subsp. subtilis</i> Strain: A1 -<br>Midalam  | 4  | 2 | 2 |
| GCF_000344<br>745 | <i>Bacillus subtilis subsp. subtilis</i> 6051-HGW                 | 0  | 0 | 0 |
| GCF_006088<br>795 | <i>Bacillus subtilis subsp. subtilis</i> NCIB 3610 =<br>ATCC 6051 | 0  | 0 | 0 |
| GCF_000186<br>085 | <i>Bacillus subtilis subsp. subtilis</i> NCIB 3610 =<br>ATCC 6051 | 2  | 1 | 0 |
| GCF_000009<br>045 | <i>Bacillus subtilis subsp. subtilis</i> str. 168                 | 11 | 5 | 8 |
| GCF_000155<br>325 | <i>Bacillus subtilis subsp. subtilis</i> str. 168                 | 3  | 1 | 2 |

|               |                                                                   |    |   |   |
|---------------|-------------------------------------------------------------------|----|---|---|
| GCF_002009095 | <i>Bacillus subtilis subsp. subtilis str. 168</i>                 | 0  | 0 | 0 |
| GCF_002009135 | <i>Bacillus subtilis subsp. subtilis str. 168</i>                 | 0  | 0 | 0 |
| GCF_012931705 | <i>Bacillus subtilis subsp. subtilis str. 168</i>                 | 0  | 0 | 0 |
| GCF_013009385 | <i>Bacillus subtilis subsp. subtilis str. 168</i>                 | 1  | 0 | 0 |
| GCF_000789275 | <i>Bacillus subtilis subsp. subtilis str. 168</i>                 | 0  | 0 | 0 |
| GCF_000699525 | <i>Bacillus subtilis subsp. subtilis str. AG1839</i>              | 0  | 0 | 0 |
| GCF_000349795 | <i>Bacillus subtilis subsp. subtilis str. BAB-1</i>               | 7  | 3 | 6 |
| GCF_000321395 | <i>Bacillus subtilis subsp. subtilis str. BSP1</i>                | 10 | 5 | 8 |
| GCF_000155355 | <i>Bacillus subtilis subsp. subtilis str. JH642</i>               | 2  | 2 | 0 |
| GCF_000699465 | <i>Bacillus subtilis subsp. subtilis str. JH642 substr. AG174</i> | 0  | 0 | 0 |
| GCF_000706705 | <i>Bacillus subtilis subsp. subtilis str. OH 131.1</i>            | 9  | 5 | 8 |
| GCF_000227485 | <i>Bacillus subtilis subsp. subtilis str. RO-NN-1</i>             | 10 | 5 | 9 |
| GCF_000155375 | <i>Bacillus subtilis subsp. subtilis str. SMY</i>                 | 1  | 1 | 1 |
| GCF_012030675 | <i>Bacillus subtilis subsp. subtilis str. SMY</i>                 | 0  | 0 | 0 |
| GCF_018986855 | <i>Bacillus subtilis subsp. subtilis Strain: Miz-8</i>            | 1  | 2 | 0 |
| GCF_000737405 | <i>Bacillus subtilis TO-A</i>                                     | 6  | 4 | 3 |
| GCF_000338735 | <i>Bacillus subtilis XF-1</i>                                     | 10 | 5 | 9 |
| GCF_012225885 | <i>Bacillus tequilensis</i>                                       | 10 | 6 | 6 |
| GCF_006151925 | <i>Bacillus thuringiensis</i>                                     | 12 | 5 | 4 |
| GCF_001017635 | <i>Bacillus thuringiensis</i>                                     | 0  | 0 | 0 |
| GCF_001182785 | <i>Bacillus thuringiensis</i>                                     | 7  | 4 | 6 |
| GCF_001420855 | <i>Bacillus thuringiensis</i>                                     | 0  | 0 | 0 |



|                   |                               |    |    |    |
|-------------------|-------------------------------|----|----|----|
| GCF_001455<br>345 | <i>Bacillus thuringiensis</i> | 7  | 2  | 11 |
| GCF_009025<br>915 | <i>Bacillus thuringiensis</i> | 0  | 0  | 0  |
| GCF_016070<br>565 | <i>Bacillus thuringiensis</i> | 8  | 3  | 4  |
| GCF_009224<br>065 | <i>Bacillus thuringiensis</i> | 5  | 4  | 3  |
| GCF_001595<br>725 | <i>Bacillus thuringiensis</i> | 20 | 10 | 3  |
| GCF_003054<br>785 | <i>Bacillus thuringiensis</i> | 10 | 8  | 3  |
| GCF_001598<br>095 | <i>Bacillus thuringiensis</i> | 4  | 0  | 2  |
| GCF_001618<br>665 | <i>Bacillus thuringiensis</i> | 0  | 0  | 0  |
| GCF_001685<br>565 | <i>Bacillus thuringiensis</i> | 2  | 1  | 5  |
| GCF_001692<br>675 | <i>Bacillus thuringiensis</i> | 5  | 6  | 3  |
| GCF_003626<br>955 | <i>Bacillus thuringiensis</i> | 4  | 1  | 1  |
| GCF_003991<br>175 | <i>Bacillus thuringiensis</i> | 6  | 3  | 3  |
| GCF_002025<br>105 | <i>Bacillus thuringiensis</i> | 5  | 4  | 3  |
| GCF_002119<br>445 | <i>Bacillus thuringiensis</i> | 1  | 0  | 0  |
| GCF_013267<br>295 | <i>Bacillus thuringiensis</i> | 0  | 0  | 0  |
| GCF_002173<br>755 | <i>Bacillus thuringiensis</i> | 2  | 3  | 3  |
| GCF_013267<br>315 | <i>Bacillus thuringiensis</i> | 0  | 0  | 0  |
| GCF_013267<br>335 | <i>Bacillus thuringiensis</i> | 0  | 0  | 0  |
| GCF_002184<br>245 | <i>Bacillus thuringiensis</i> | 6  | 3  | 4  |
| GCF_002192<br>515 | <i>Bacillus thuringiensis</i> | 4  | 1  | 2  |
| GCF_013267<br>795 | <i>Bacillus thuringiensis</i> | 0  | 0  | 0  |
| GCF_013267<br>815 | <i>Bacillus thuringiensis</i> | 0  | 0  | 0  |

|                   |                                               |    |   |   |
|-------------------|-----------------------------------------------|----|---|---|
| GCF_004194<br>435 | <i>Bacillus thuringiensis</i>                 | 3  | 0 | 1 |
| GCF_004194<br>455 | <i>Bacillus thuringiensis</i>                 | 1  | 0 | 0 |
| GCF_004194<br>475 | <i>Bacillus thuringiensis</i>                 | 2  | 1 | 1 |
| GCF_000832<br>485 | <i>Bacillus thuringiensis</i>                 | 0  | 2 | 0 |
| GCF_013340<br>745 | <i>Bacillus thuringiensis</i>                 | 11 | 9 | 6 |
| GCF_013343<br>075 | <i>Bacillus thuringiensis</i>                 | 0  | 0 | 0 |
| GCF_004354<br>265 | <i>Bacillus thuringiensis</i>                 | 6  | 0 | 1 |
| GCF_000832<br>825 | <i>Bacillus thuringiensis</i>                 | 0  | 0 | 0 |
| GCF_002222<br>555 | <i>Bacillus thuringiensis</i>                 | 4  | 3 | 3 |
| GCF_005155<br>285 | <i>Bacillus thuringiensis</i>                 | 0  | 0 | 0 |
| GCF_000832<br>925 | <i>Bacillus thuringiensis</i>                 | 5  | 1 | 4 |
| GCF_000833<br>085 | <i>Bacillus thuringiensis</i>                 | 5  | 0 | 4 |
| GCF_017751<br>245 | <i>Bacillus thuringiensis</i> Strain: Bt-GS57 | 0  | 0 | 0 |
| GCF_017378<br>115 | <i>Bacillus thuringiensis</i> Strain: TAND672 | 0  | 0 | 0 |
| GCF_000092<br>165 | <i>Bacillus thuringiensis</i> BMB171          | 7  | 6 | 5 |
| GCF_001721<br>165 | <i>Bacillus thuringiensis</i> Bt18247         | 3  | 2 | 4 |
| GCF_000161<br>495 | <i>Bacillus thuringiensis</i> Bt407           | 7  | 5 | 8 |
| GCF_000306<br>745 | <i>Bacillus thuringiensis</i> Bt407           | 0  | 0 | 0 |
| GCF_000342<br>025 | <i>Bacillus thuringiensis</i> DAR 81934       | 8  | 5 | 7 |
| GCF_000835<br>025 | <i>Bacillus thuringiensis</i> HD1002          | 0  | 0 | 0 |
| GCF_000292<br>455 | <i>Bacillus thuringiensis</i> HD-771          | 7  | 5 | 6 |
| GCF_000292<br>705 | <i>Bacillus thuringiensis</i> HD-789          | 2  | 0 | 0 |

|                   |                                                                          |    |   |    |
|-------------------|--------------------------------------------------------------------------|----|---|----|
| GCF_000161<br>715 | <i>Bacillus thuringiensis</i> IBL 200                                    | 10 | 7 | 9  |
| GCF_000161<br>735 | <i>Bacillus thuringiensis</i> IBL 4222                                   | 13 | 6 | 8  |
| GCF_003546<br>665 | <i>Bacillus thuringiensis</i> LM1212                                     | 6  | 2 | 9  |
| GCF_000300<br>475 | <i>Bacillus thuringiensis</i> MC28                                       | 2  | 2 | 5  |
| GCF_001640<br>965 | <i>Bacillus thuringiensis</i> serovar <i>alesti</i>                      | 6  | 3 | 6  |
| GCF_012222<br>085 | <i>Bacillus thuringiensis</i> serovar <i>andalousiensis</i>              | 6  | 5 | 10 |
| GCF_000161<br>635 | <i>Bacillus thuringiensis</i> serovar <i>andalousiensis</i><br>BGSC 4AW1 | 4  | 3 | 4  |
| GCF_000161<br>615 | <i>Bacillus thuringiensis</i> serovar <i>berliner</i> ATCC<br>10792      | 2  | 2 | 1  |
| GCF_000193<br>355 | <i>Bacillus thuringiensis</i> serovar <i>chinensis</i> CT-43             | 0  | 0 | 0  |
| GCF_000803<br>665 | <i>Bacillus thuringiensis</i> serovar <i>galleriae</i>                   | 6  | 6 | 1  |
| GCF_000161<br>675 | <i>Bacillus thuringiensis</i> serovar <i>huazhongensis</i><br>BGSC 4BD1  | 22 | 8 | 7  |
| GCF_001183<br>785 | <i>Bacillus thuringiensis</i> serovar <i>indiana</i>                     | 10 | 5 | 4  |
| GCF_003445<br>395 | <i>Bacillus thuringiensis</i> serovar <i>israelensis</i>                 | 0  | 0 | 1  |
| GCF_013113<br>775 | <i>Bacillus thuringiensis</i> serovar <i>israelensis</i>                 | 0  | 0 | 0  |
| GCF_000835<br>235 | <i>Bacillus thuringiensis</i> serovar <i>kurstaki</i>                    | 0  | 0 | 0  |
| GCF_000717<br>535 | <i>Bacillus thuringiensis</i> serovar <i>kurstaki</i> str. HD-1          | 7  | 2 | 3  |
| GCF_000338<br>755 | <i>Bacillus thuringiensis</i> serovar <i>kurstaki</i> str. HD73          | 1  | 0 | 0  |
| GCF_000161<br>575 | <i>Bacillus thuringiensis</i> serovar <i>kurstaki</i> str.<br>T03a001    | 7  | 3 | 4  |
| GCF_000688<br>795 | <i>Bacillus thuringiensis</i> serovar <i>kurstaki</i> str. YBT-<br>1520  | 6  | 5 | 1  |
| GCF_000747<br>545 | <i>Bacillus thuringiensis</i> serovar <i>kurstaki</i> str. YBT-<br>1520  | 3  | 1 | 0  |
| GCF_000161<br>595 | <i>Bacillus thuringiensis</i> serovar <i>monterrey</i> BGSC<br>4AJ1      | 8  | 5 | 8  |
| GCF_000940<br>785 | <i>Bacillus thuringiensis</i> serovar <i>morrisoni</i>                   | 7  | 4 | 3  |

|            |                                                                 |    |   |   |
|------------|-----------------------------------------------------------------|----|---|---|
| GCF_000161 | <i>Bacillus thuringiensis</i> serovar <i>pakistani</i> str.     |    |   |   |
| 555        | T13001                                                          | 6  | 5 | 6 |
| GCF_000161 | <i>Bacillus thuringiensis</i> serovar <i>pondicheriensis</i>    |    |   |   |
| 655        | BGSC 4BA1                                                       | 7  | 7 | 6 |
| GCF_000161 | <i>Bacillus thuringiensis</i> serovar <i>pulsiensis</i> BGSC    |    |   |   |
| 695        | 4CC1                                                            | 11 | 6 | 8 |
| GCF_000341 | <i>Bacillus thuringiensis</i> serovar <i>thuringiensis</i> str. |    |   |   |
| 665        | IS5056                                                          | 1  | 1 | 0 |
| GCF_000161 | <i>Bacillus thuringiensis</i> serovar <i>thuringiensis</i> str. |    |   |   |
| 515        | T01001                                                          | 6  | 6 | 2 |
| GCF_001548 | <i>Bacillus thuringiensis</i> serovar <i>tolworthi</i>          |    |   |   |
| 175        |                                                                 | 7  | 7 | 6 |
| GCF_000015 | <i>Bacillus thuringiensis</i> str. <i>Al Hakam</i>              |    |   |   |
| 065        |                                                                 | 4  | 2 | 7 |
| GCF_018885 | <i>Bacillus thuringiensis</i> Strain: GR007                     |    |   |   |
| 365        |                                                                 | 0  | 0 | 0 |
| GCF_000497 | <i>Bacillus thuringiensis</i> YBT-1518                          |    |   |   |
| 525        |                                                                 | 6  | 3 | 6 |
| GCF_016605 | <i>Bacillus toyonensis</i>                                      |    |   |   |
| 985        |                                                                 | 3  | 2 | 3 |
| GCF_018739 | <i>Bacillus toyonensis</i> Strain: BPN45/4                      |    |   |   |
| 605        |                                                                 | 1  | 1 | 2 |
| GCF_018741 | <i>Bacillus toyonensis</i> Strain: JAS03/3                      |    |   |   |
| 125        |                                                                 | 4  | 2 | 2 |
| GCF_018741 | <i>Bacillus toyonensis</i> Strain: JAS22/1                      |    |   |   |
| 545        |                                                                 | 5  | 3 | 1 |
| GCF_018741 | <i>Bacillus toyonensis</i> Strain: JAS13/1                      |    |   |   |
| 525        |                                                                 | 8  | 4 | 6 |
| GCF_000496 | <i>Bacillus toyonensis</i> BCT-7112                             |    |   |   |
| 285        |                                                                 | 0  | 2 | 0 |
| GCF_018741 | <i>Bacillus toyonensis</i> Strain: JAS411                       |    |   |   |
| 625        |                                                                 | 0  | 0 | 0 |
| GCF_016026 | <i>Bacillus tropicus</i>                                        |    |   |   |
| 855        |                                                                 | 0  | 0 | 0 |
| GCF_016027 | <i>Bacillus tropicus</i>                                        |    |   |   |
| 575        |                                                                 | 0  | 0 | 0 |
| GCF_011040 | <i>Bacillus tropicus</i>                                        |    |   |   |
| 455        |                                                                 | 3  | 1 | 6 |
| GCF_013331 | <i>Bacillus tropicus</i>                                        |    |   |   |
| 815        |                                                                 | 0  | 0 | 0 |
| GCF_018141 | <i>Bacillus tropicus</i> Strain: LM1212-DB                      |    |   |   |
| 085        |                                                                 | 0  | 0 | 0 |
| GCF_003667 | <i>Bacillus vallismortis</i>                                    |    |   |   |
| 885        |                                                                 | 9  | 7 | 8 |

|                   |                              |    |    |    |
|-------------------|------------------------------|----|----|----|
| GCF_004116<br>955 | <i>Bacillus vallismortis</i> | 10 | 5  | 6  |
| GCF_002113<br>805 | <i>Bacillus vallismortis</i> | 0  | 1  | 0  |
| GCF_000875<br>875 | <i>Bacillus velezensis</i>   | 12 | 12 | 8  |
| GCF_014358<br>035 | <i>Bacillus velezensis</i>   | 0  | 0  | 0  |
| GCF_002290<br>045 | <i>Bacillus velezensis</i>   | 17 | 15 | 8  |
| GCF_006489<br>235 | <i>Bacillus velezensis</i>   | 4  | 4  | 0  |
| GCF_014495<br>825 | <i>Bacillus velezensis</i>   | 8  | 4  | 4  |
| GCF_006489<br>255 | <i>Bacillus velezensis</i>   | 0  | 0  | 0  |
| GCF_006489<br>275 | <i>Bacillus velezensis</i>   | 3  | 4  | 1  |
| GCF_014622<br>705 | <i>Bacillus velezensis</i>   | 0  | 0  | 0  |
| GCF_002310<br>315 | <i>Bacillus velezensis</i>   | 0  | 1  | 0  |
| GCF_002327<br>165 | <i>Bacillus velezensis</i>   | 2  | 1  | 0  |
| GCF_000973<br>485 | <i>Bacillus velezensis</i>   | 3  | 3  | 0  |
| GCF_014706<br>595 | <i>Bacillus velezensis</i>   | 11 | 14 | 10 |
| GCF_014764<br>325 | <i>Bacillus velezensis</i>   | 5  | 4  | 2  |
| GCF_006965<br>525 | <i>Bacillus velezensis</i>   | 7  | 5  | 1  |
| GCF_014841<br>075 | <i>Bacillus velezensis</i>   | 0  | 0  | 0  |
| GCF_000987<br>825 | <i>Bacillus velezensis</i>   | 12 | 13 | 8  |
| GCF_006974<br>185 | <i>Bacillus velezensis</i>   | 0  | 0  | 1  |
| GCF_000988<br>345 | <i>Bacillus velezensis</i>   | 5  | 8  | 3  |
| GCF_002556<br>565 | <i>Bacillus velezensis</i>   | 11 | 13 | 11 |
| GCF_002688<br>525 | <i>Bacillus velezensis</i>   | 4  | 0  | 1  |

|                   |                            |    |    |   |
|-------------------|----------------------------|----|----|---|
| GCF_001023<br>595 | <i>Bacillus velezensis</i> | 10 | 13 | 9 |
| GCF_002741<br>705 | <i>Bacillus velezensis</i> | 11 | 13 | 8 |
| GCF_014961<br>825 | <i>Bacillus velezensis</i> | 0  | 0  | 0 |
| GCF_002761<br>535 | <i>Bacillus velezensis</i> | 14 | 14 | 8 |
| GCF_002764<br>075 | <i>Bacillus velezensis</i> | 7  | 3  | 4 |
| GCF_015239<br>615 | <i>Bacillus velezensis</i> | 2  | 6  | 2 |
| GCF_002796<br>465 | <i>Bacillus velezensis</i> | 14 | 13 | 9 |
| GCF_015277<br>495 | <i>Bacillus velezensis</i> | 2  | 2  | 1 |
| GCF_015291<br>865 | <i>Bacillus velezensis</i> | 11 | 12 | 5 |
| GCF_008244<br>925 | <i>Bacillus velezensis</i> | 12 | 11 | 6 |
| GCF_002844<br>125 | <i>Bacillus velezensis</i> | 1  | 2  | 0 |
| GCF_002845<br>365 | <i>Bacillus velezensis</i> | 6  | 12 | 8 |
| GCF_002850<br>475 | <i>Bacillus velezensis</i> | 13 | 15 | 8 |
| GCF_008367<br>895 | <i>Bacillus velezensis</i> | 2  | 0  | 0 |
| GCF_015732<br>475 | <i>Bacillus velezensis</i> | 11 | 18 | 8 |
| GCF_002893<br>845 | <i>Bacillus velezensis</i> | 7  | 5  | 4 |
| GCF_002944<br>585 | <i>Bacillus velezensis</i> | 9  | 10 | 7 |
| GCF_008727<br>675 | <i>Bacillus velezensis</i> | 8  | 12 | 7 |
| GCF_008802<br>875 | <i>Bacillus velezensis</i> | 0  | 0  | 0 |
| GCF_001536<br>925 | <i>Bacillus velezensis</i> | 8  | 15 | 9 |
| GCF_002968<br>415 | <i>Bacillus velezensis</i> | 6  | 5  | 2 |
| GCF_016065<br>635 | <i>Bacillus velezensis</i> | 0  | 1  | 0 |

|                   |                            |    |    |    |
|-------------------|----------------------------|----|----|----|
| GCF_002993<br>245 | <i>Bacillus velezensis</i> | 10 | 14 | 10 |
| GCF_009362<br>235 | <i>Bacillus velezensis</i> | 0  | 0  | 0  |
| GCF_003045<br>165 | <i>Bacillus velezensis</i> | 0  | 0  | 0  |
| GCF_016406<br>185 | <i>Bacillus velezensis</i> | 11 | 14 | 7  |
| GCF_001593<br>395 | <i>Bacillus velezensis</i> | 12 | 14 | 5  |
| GCF_003047<br>005 | <i>Bacillus velezensis</i> | 0  | 1  | 1  |
| GCF_016415<br>725 | <i>Bacillus velezensis</i> | 13 | 12 | 10 |
| GCF_003047<br>025 | <i>Bacillus velezensis</i> | 0  | 0  | 0  |
| GCF_003047<br>045 | <i>Bacillus velezensis</i> | 0  | 1  | 1  |
| GCF_016766<br>595 | <i>Bacillus velezensis</i> | 13 | 12 | 5  |
| GCF_003071<br>465 | <i>Bacillus velezensis</i> | 4  | 4  | 1  |
| GCF_003073<br>255 | <i>Bacillus velezensis</i> | 15 | 16 | 11 |
| GCF_003073<br>455 | <i>Bacillus velezensis</i> | 0  | 0  | 0  |
| GCF_003076<br>535 | <i>Bacillus velezensis</i> | 12 | 9  | 11 |
| GCF_016801<br>735 | <i>Bacillus velezensis</i> | 0  | 0  | 0  |
| GCF_016834<br>435 | <i>Bacillus velezensis</i> | 8  | 7  | 2  |
| GCF_016859<br>395 | <i>Bacillus velezensis</i> | 0  | 2  | 1  |
| GCF_016888<br>865 | <i>Bacillus velezensis</i> | 0  | 0  | 0  |
| GCF_003150<br>855 | <i>Bacillus velezensis</i> | 1  | 7  | 3  |
| GCF_009663<br>035 | <i>Bacillus velezensis</i> | 11 | 13 | 13 |
| GCF_016904<br>925 | <i>Bacillus velezensis</i> | 15 | 15 | 10 |
| GCF_009664<br>145 | <i>Bacillus velezensis</i> | 5  | 6  | 2  |



|                   |                            |    |    |    |
|-------------------|----------------------------|----|----|----|
| GCF_003184<br>945 | <i>Bacillus velezensis</i> | 14 | 14 | 9  |
| GCF_003265<br>265 | <i>Bacillus velezensis</i> | 2  | 1  | 0  |
| GCF_003285<br>085 | <i>Bacillus velezensis</i> | 3  | 1  | 0  |
| GCF_009738<br>165 | <i>Bacillus velezensis</i> | 10 | 15 | 9  |
| GCF_003390<br>415 | <i>Bacillus velezensis</i> | 9  | 17 | 8  |
| GCF_001685<br>645 | <i>Bacillus velezensis</i> | 12 | 12 | 12 |
| GCF_009789<br>615 | <i>Bacillus velezensis</i> | 11 | 11 | 5  |
| GCF_001687<br>745 | <i>Bacillus velezensis</i> | 4  | 2  | 0  |
| GCF_003431<br>885 | <i>Bacillus velezensis</i> | 0  | 0  | 0  |
| GCF_003432<br>425 | <i>Bacillus velezensis</i> | 9  | 9  | 8  |
| GCF_003441<br>635 | <i>Bacillus velezensis</i> | 13 | 18 | 5  |
| GCF_009834<br>085 | <i>Bacillus velezensis</i> | 7  | 8  | 6  |
| GCF_003546<br>955 | <i>Bacillus velezensis</i> | 10 | 11 | 9  |
| GCF_009856<br>975 | <i>Bacillus velezensis</i> | 9  | 11 | 10 |
| GCF_003555<br>525 | <i>Bacillus velezensis</i> | 0  | 0  | 0  |
| GCF_001723<br>585 | <i>Bacillus velezensis</i> | 9  | 13 | 7  |
| GCF_003573<br>875 | <i>Bacillus velezensis</i> | 11 | 13 | 11 |
| GCF_009913<br>295 | <i>Bacillus velezensis</i> | 14 | 11 | 10 |
| GCF_003612<br>755 | <i>Bacillus velezensis</i> | 0  | 0  | 0  |
| GCF_009913<br>315 | <i>Bacillus velezensis</i> | 9  | 9  | 6  |
| GCF_001752<br>685 | <i>Bacillus velezensis</i> | 12 | 15 | 10 |
| GCF_009913<br>335 | <i>Bacillus velezensis</i> | 0  | 0  | 0  |

|                   |                            |    |    |    |
|-------------------|----------------------------|----|----|----|
| GCF_009913<br>355 | <i>Bacillus velezensis</i> | 7  | 9  | 3  |
| GCF_009913<br>375 | <i>Bacillus velezensis</i> | 1  | 1  | 0  |
| GCF_001854<br>345 | <i>Bacillus velezensis</i> | 16 | 13 | 9  |
| GCF_009913<br>475 | <i>Bacillus velezensis</i> | 0  | 0  | 0  |
| GCF_009913<br>495 | <i>Bacillus velezensis</i> | 0  | 0  | 0  |
| GCF_001857<br>985 | <i>Bacillus velezensis</i> | 11 | 12 | 10 |
| GCF_009914<br>135 | <i>Bacillus velezensis</i> | 14 | 10 | 9  |
| GCF_003667<br>745 | <i>Bacillus velezensis</i> | 13 | 11 | 8  |
| GCF_009914<br>175 | <i>Bacillus velezensis</i> | 8  | 12 | 5  |
| GCF_009931<br>675 | <i>Bacillus velezensis</i> | 15 | 15 | 8  |
| GCF_003721<br>475 | <i>Bacillus velezensis</i> | 15 | 12 | 8  |
| GCF_003854<br>915 | <i>Bacillus velezensis</i> | 10 | 12 | 8  |
| GCF_003855<br>275 | <i>Bacillus velezensis</i> | 4  | 3  | 2  |
| GCF_003860<br>445 | <i>Bacillus velezensis</i> | 3  | 3  | 2  |
| GCF_011032<br>725 | <i>Bacillus velezensis</i> | 1  | 1  | 0  |
| GCF_011100<br>445 | <i>Bacillus velezensis</i> | 4  | 0  | 0  |
| GCF_011769<br>925 | <i>Bacillus velezensis</i> | 0  | 0  | 0  |
| GCF_002005<br>345 | <i>Bacillus velezensis</i> | 18 | 13 | 10 |
| GCF_011784<br>665 | <i>Bacillus velezensis</i> | 9  | 11 | 5  |
| GCF_012226<br>065 | <i>Bacillus velezensis</i> | 12 | 14 | 10 |
| GCF_002057<br>535 | <i>Bacillus velezensis</i> | 0  | 0  | 0  |
| GCF_002072<br>695 | <i>Bacillus velezensis</i> | 0  | 1  | 0  |

|                   |                            |    |    |    |
|-------------------|----------------------------|----|----|----|
| GCF_004101<br>805 | <i>Bacillus velezensis</i> | 16 | 10 | 7  |
| GCF_012275<br>165 | <i>Bacillus velezensis</i> | 1  | 2  | 0  |
| GCF_012647<br>845 | <i>Bacillus velezensis</i> | 6  | 4  | 0  |
| GCF_002105<br>595 | <i>Bacillus velezensis</i> | 9  | 12 | 8  |
| GCF_000769<br>555 | <i>Bacillus velezensis</i> | 4  | 3  | 0  |
| GCF_002117<br>165 | <i>Bacillus velezensis</i> | 0  | 0  | 0  |
| GCF_004119<br>575 | <i>Bacillus velezensis</i> | 8  | 7  | 5  |
| GCF_013122<br>275 | <i>Bacillus velezensis</i> | 0  | 0  | 0  |
| GCF_013201<br>135 | <i>Bacillus velezensis</i> | 0  | 0  | 0  |
| GCF_013201<br>465 | <i>Bacillus velezensis</i> | 16 | 13 | 8  |
| GCF_004119<br>735 | <i>Bacillus velezensis</i> | 4  | 2  | 1  |
| GCF_000815<br>275 | <i>Bacillus velezensis</i> | 11 | 16 | 13 |
| GCF_002192<br>235 | <i>Bacillus velezensis</i> | 0  | 0  | 0  |
| GCF_004119<br>855 | <i>Bacillus velezensis</i> | 0  | 0  | 0  |
| GCF_004135<br>455 | <i>Bacillus velezensis</i> | 12 | 14 | 12 |
| GCF_002205<br>715 | <i>Bacillus velezensis</i> | 11 | 12 | 10 |
| GCF_004329<br>055 | <i>Bacillus velezensis</i> | 6  | 4  | 1  |
| GCF_004331<br>895 | <i>Bacillus velezensis</i> | 12 | 14 | 8  |
| GCF_004337<br>655 | <i>Bacillus velezensis</i> | 6  | 4  | 1  |
| GCF_013348<br>705 | <i>Bacillus velezensis</i> | 1  | 0  | 0  |
| GCF_013367<br>755 | <i>Bacillus velezensis</i> | 0  | 0  | 0  |
| GCF_002216<br>755 | <i>Bacillus velezensis</i> | 5  | 6  | 0  |

|                   |                                            |    |    |    |
|-------------------|--------------------------------------------|----|----|----|
| GCF_004799<br>565 | <i>Bacillus velezensis</i>                 | 10 | 13 | 8  |
| GCF_013401<br>395 | <i>Bacillus velezensis</i>                 | 12 | 12 | 8  |
| GCF_013694<br>265 | <i>Bacillus velezensis</i>                 | 10 | 12 | 11 |
| GCF_002237<br>515 | <i>Bacillus velezensis</i>                 | 8  | 11 | 7  |
| GCF_013701<br>805 | <i>Bacillus velezensis</i>                 | 0  | 0  | 0  |
| GCF_002238<br>395 | <i>Bacillus velezensis</i>                 | 8  | 14 | 3  |
| GCF_013875<br>015 | <i>Bacillus velezensis</i>                 | 10 | 8  | 5  |
| GCF_002243<br>325 | <i>Bacillus velezensis</i>                 | 11 | 15 | 10 |
| GCF_005696<br>395 | <i>Bacillus velezensis</i>                 | 10 | 11 | 12 |
| GCF_000833<br>005 | <i>Bacillus velezensis</i>                 | 10 | 15 | 9  |
| GCF_014048<br>285 | <i>Bacillus velezensis</i>                 | 11 | 13 | 7  |
| GCF_014048<br>385 | <i>Bacillus velezensis</i>                 | 9  | 13 | 7  |
| GCF_014117<br>505 | <i>Bacillus velezensis</i>                 | 22 | 24 | 11 |
| GCF_014180<br>705 | <i>Bacillus velezensis</i>                 | 6  | 7  | 4  |
| GCF_014211<br>995 | <i>Bacillus velezensis</i>                 | 0  | 0  | 0  |
| GCF_017347<br>625 | <i>Bacillus velezensis</i> Strain: AD-3    | 12 | 7  | 7  |
| GCF_017742<br>975 | <i>Bacillus velezensis</i> Strain: AD8     | 10 | 15 | 9  |
| GCF_019222<br>745 | <i>Bacillus velezensis</i> Strain: BS-G1   | 0  | 0  | 0  |
| GCF_009734<br>085 | <i>Bacillus velezensis</i> Strain: GA1     | 1  | 2  | 0  |
| GCF_019334<br>525 | <i>Bacillus velezensis</i> Strain: LABIM44 | 7  | 12 | 10 |
| GCF_019285<br>615 | <i>Bacillus velezensis</i> Strain: LBY-1   | 10 | 11 | 4  |
| GCF_018415<br>955 | <i>Bacillus velezensis</i> Strain: VTX20   | 9  | 13 | 6  |

|                   |                                            |    |    |    |
|-------------------|--------------------------------------------|----|----|----|
| GCF_017948<br>225 | <i>Bacillus velezensis</i> Strain: VY03    | 9  | 12 | 3  |
| GCF_019464<br>595 | <i>Bacillus velezensis</i> Strain: WB      | 0  | 1  | 0  |
| GCF_018223<br>705 | <i>Bacillus velezensis</i> Strain: Y816    | 12 | 11 | 8  |
| GCF_019163<br>475 | <i>Bacillus velezensis</i> Strain: YYC     | 2  | 1  | 0  |
| GCF_019551<br>675 | <i>Bacillus velezensis</i> Strain: 19573-3 | 0  | 0  | 0  |
| GCF_018866<br>365 | <i>Bacillus velezensis</i> Strain: GMEKP1  | 1  | 3  | 1  |
| GCF_018775<br>385 | <i>Bacillus velezensis</i> Strain: J17-4   | 0  | 1  | 0  |
| GCF_018406<br>485 | <i>Bacillus velezensis</i> Strain: KOF112  | 1  | 0  | 0  |
| GCF_018732<br>185 | <i>Bacillus velezensis</i> Strain: NZ4     | 14 | 12 | 7  |
| GCF_018771<br>705 | <i>Bacillus velezensis</i> Strain: US1     | 0  | 0  | 0  |
| GCF_018629<br>015 | <i>Bacillus velezensis</i> Strain: VCN56   | 11 | 8  | 2  |
| GCF_018398<br>955 | <i>Bacillus velezensis</i> Strain: VTX9    | 10 | 17 | 8  |
| GCF_000319<br>475 | <i>Bacillus velezensis</i> AS43.3          | 11 | 14 | 11 |
| GCF_000283<br>695 | <i>Bacillus velezensis</i> CAU B946        | 9  | 15 | 11 |
| GCF_000015<br>785 | <i>Bacillus velezensis</i> FZB42           | 14 | 16 | 12 |
| GCF_000493<br>375 | <i>Bacillus velezensis</i> NAU-B3          | 12 | 12 | 9  |
| GCF_000973<br>585 | <i>Bacillus velezensis</i> NJN-6           | 7  | 4  | 0  |
| GCF_000685<br>725 | <i>Bacillus velezensis</i> SQR9            | 11 | 17 | 10 |
| GCF_019449<br>395 | <i>Bacillus velezensis</i> Strain: GS-1    | 4  | 6  | 2  |
| GCF_018278<br>845 | <i>Bacillus velezensis</i> Strain: JK19    | 5  | 3  | 0  |
| GCF_018771<br>665 | <i>Bacillus velezensis</i> Strain: Q12     | 9  | 6  | 1  |
| GCF_000583<br>065 | <i>Bacillus velezensis</i> TrigoCor1448    | 12 | 15 | 9  |

|                   |                                            |    |    |    |
|-------------------|--------------------------------------------|----|----|----|
| GCF_000455<br>565 | <i>Bacillus velezensis</i> UCMB5033        | 12 | 15 | 11 |
| GCF_000341<br>875 | <i>Bacillus velezensis</i> UCMB5036        | 12 | 15 | 11 |
| GCF_000455<br>585 | <i>Bacillus velezensis</i> UCMB5113        | 13 | 13 | 10 |
| GCF_000284<br>395 | <i>Bacillus velezensis</i> YAU B9601-Y2    | 4  | 2  | 0  |
| GCF_001889<br>165 | <i>Bacillus weihaiensis</i>                | 4  | 2  | 3  |
| GCF_000160<br>955 | <i>Bacillus wiedmannii</i>                 | 5  | 1  | 9  |
| GCF_008807<br>735 | <i>Bacillus wiedmannii</i>                 | 6  | 2  | 9  |
| GCF_018741<br>285 | <i>Bacillus wiedmannii</i> Strain: JAS07/5 | 8  | 5  | 10 |
| GCF_018741<br>405 | <i>Bacillus wiedmannii</i> Strain: JAS08/1 | 3  | 1  | 9  |
| GCF_018741<br>585 | <i>Bacillus wiedmannii</i> Strain: JAS28/2 | 9  | 6  | 8  |
| GCF_001857<br>925 | <i>Bacillus xiamenensis</i>                | 4  | 3  | 8  |
